# Glycosaminoglycans and glycoproteins influence the elastic response of synovial fluid nanofilms on model oxide surfaces

Amar S. Mann,<sup>1</sup> Ariell M. Smith,<sup>1</sup> Joyce O. Saltzherr,<sup>1</sup> Arvind Gopinath,<sup>2,3</sup> Roberto C. Andresen Eguiluz<sup>1,3\*</sup>

<sup>1</sup>Department of Materials Science and Engineering, <sup>2</sup>Department of Bioengineering, Health

<sup>3</sup>Sciences Research Institute, University of California, Merced, California 95344, United States

## AUTHOR INFORMATION

### ORCID

Amar S. Mann: 0000-0003-0208-9750

Joyce O. Saltzherr: 0000-0002-3537-3152

Ariell M. Smith: 0000-0002-4788-4611

Arvind Gopinath: 0000-0002-7824-3163

Roberto C. Andresen Eguiluz: 0000-0002-5209-4112

### Corresponding author

[\\*randreseneguiluz@ucmerced.edu](mailto:*randreseneguiluz@ucmerced.edu)

### Author contributions

A.S.M., A.M.S, and R.C.A.E. designed and conducted experiments. A.S.M., A.M.S., J.O.S., and R.C.A.E developed analytical tools and analyzed data. A.S.M. and R.C.A.E. interpreted results. A.S.M., A.M.S., J.O.S., A.G., and R.C.A.E. wrote the paper. All authors have approved the final version of the manuscript.

## **ABSTRACT**

Synovial fluid (SF) is the natural lubricant found in articulated joints, providing unique cartilage surface protecting films under confinement and relative motion. While it is known that the synergistic interactions of the macromolecular constituents provide its unique load-bearing and tribological performance, it is not fully understood how two of the main constituents, glycosaminoglycans (GAGs) and glycoproteins, regulate the formation and mechanics of robust load-bearing films. Here, we present evidence that the load-bearing capabilities, rather than the tribological performance, of the formed SF films depend strongly on its components' integrity. For this purpose, we used a combination of enzymatic treatments, quartz crystal microbalance with dissipation (QCM-D) and the surface forces apparatus (SFA) to characterize the formation and load-bearing capabilities of SF films on model oxide (i.e., silicates) surfaces. We find that, upon cleavage of proteins, the elasticity of the films is reduced and that cleaving GAGs results in irreversible (plastic) molecular re-arrangements of the film constituents when subjected to confinement. Understanding thin film mechanics of SF can provide insight into the progression of diseases, such as arthritis, but may also be applicable to the development of new implant surface treatments or new biomimetic lubricants.

## **KEYWORDS**

Synovial Fluid; Glycosaminoglycans/Glycoproteins; Nanofilm confinement; Oxide surfaces; Surface Forces Apparatus; Quartz Crystal Microbalance with Dissipation;

## INTRODUCTION

Despite intense research efforts to elucidate the molecular mechanisms that allow articular joints to support high stresses and deformations over a person's life span, it remains unclear what role synovial fluid (SF) plays in load-bearing and boundary lubricating conditions. SF is a complex fluid composed of a mixture of biomolecules and ions, such as glycosaminoglycans (e.g., hyaluronan), glycoproteins (e.g., lubricin), seric proteins (e.g., albumin), lipids (e.g., DPPC), among others. These give rise to a highly viscous liquid in homeostasis, with various identified biochemical[1] and biomechanical[2] functions. SF components adsorb to the articular cartilage or implant surfaces and form films that arrest cell attachment[3,4] and maintain surfaces separated at high contact pressures. This prevents adhesion,[5] and when the surfaces are in relative motion, provides wear protection and lubrication.[6,7]

The ability of specific SF components to adsorb to surfaces is crucial to build and control the supramolecular assembly of an effective load-bearing, wear-protecting, and lubricating film. Without it, molecules would be squeezed out from the junction at the high contact (normal) loads experienced during locomotion (~10-15 MPa).[8] For example, hyaluronan, a major component of SF, has been shown to provide remarkable wear protection only when strongly bound (chemisorbed) to model mica substrates, expelled and poorly protecting against wear when weakly bound (physisorbed).[9–11] Molecular complexation has been demonstrated to control the mechanical response of SF components. For instance, single-molecule stretching studies using magnetic tweezers force spectroscopy exemplified that the degree of glycosylation regulates tension in the hyaluronan-aggreCAN bottlebrush complex,[12] abundant in SF, and is suggested to impact cartilage normal load bearing at the mesoscale.[13] Additionally, concentrations of SF components can tune the conformations adopted by biomolecules due to crowding effects. That is the case for isolated lubricin, which adopts different conformations when adsorbed to mica surfaces depending on its concentration.[14] Combined, it is clear that each of the above mentioned parameters (*i.e.*, adsorption to surfaces, complexation, conformation) are crucial for load-bearing films' proper function. A biochemical imbalance will invariably result in a biomechanical imbalance as well. This is evidenced in rheology studies of synovial fluids obtained from patients with various autoimmune or trauma related joint pathophysiology, in which downregulation of SF component concentrations or shift in molecular weight distributions lead to altered viscosity and viscoelastic responses.[4,15]

Many SF studies have focused on the lubricity and wear protection properties of isolated components, such as lubricin,[14,16] hyaluronan,[10,11] or lipids.[17,18] Higher-order mixtures studies, such as hyaluronan and lubricin,[19–21] hyaluronan and phospholipids,[22–25] lubricin and galectins,[26] or hyaluronan and aggrecans,[27,28] combined with a top-down approach in which different components have been enzymatically digested,[29,30] emphasize that it is the synergistic interactions that provide SF's unique load-bearing, wear protecting, and lubricating properties. Still, less is known about the formation of SF films on surfaces and film properties, such as viscoelasticity and load-bearing capabilities. The present study provides evidence that the load-bearing capabilities of the formed SF films depends strongly on the integrity of its components. Particularly, we focus on glycosaminoglycans (GAGs) and glycoproteins' roles in the formation kinetics, viscoelasticity, and load-bearing mechanics of protecting SF films. For this purpose, we used a combination of quartz crystal microbalance with dissipation (QCM-D) and the surface forces apparatus (SFA) to characterize the formation and load-bearing properties of SF films on model oxide (silica and mica) surfaces and elucidate the SF film's structural changes

under different enzymatic treatments and dilutions. We find that the absence of either GAGs or proteins dysregulates the load-bearing capabilities. Therefore, the findings reported can be of relevance to understand the formation of protecting films on cartilage or implant surfaces. Furthermore, we emphasize the importance of load-bearing properties of SFs under confinement in addition to the tribological characterization, to fully understand the supramolecular assemblies and synergistic interactions of SF components.

## EXPERIMENTAL SECTION

**Synovial fluids.** All experiments performed with synovial fluid (SF) were in agreement with the procedures and guidelines provided by the biosafety committee at the University of California Merced.

Pooled bovine SF (Lampire Biological Laboratories, 8600853) was used to prepare working aliquots, kept frozen ( $T = -80^{\circ}\text{C}$ ) and thawed the day of the experiment. SF was first centrifuged for 5 min at 6000 rpm for all experiments to remove cell debris and large tissue aggregates, and suspension moved to a new tube. This condition is referred to from now on as nontreated SF. To cleave GAGs in SF, centrifuged and undiluted SF was treated with 2  $\mu\text{L}$  of 1.25 mg/mL hyaluronidase (HAase) from bovine testes (Sigma, H3506) for every 50  $\mu\text{L}$  of SF, following established protocols.[7,30] SF plus the hyaluronidase were placed on a shaker for 1.5 to 2 hrs., followed by a second centrifugation step, 5 min at 6000 rpm, and the suspension transferred to a new tube. This condition is referred to from now on as SF+HAase. To digest proteins present in SF, centrifuged and undiluted SF was treated with 2 mg/mL trypsin from bovine pancreas, tosyl phenylalanyl chloromethyl ketone (TPCK) treated and salt-free (Sigma, T1426) stock solution, from which 25  $\mu\text{L}$  were added for every 1 mL SF, following established protocols.[7,30] SF plus trypsin were placed in an incubator at  $37^{\circ}\text{C}$  for at least 2 hrs. There was no need for a second centrifugation step for trypsin-treated SF, as no supernatants were ever found. This condition is referred to from now on as SF+Trypsin.

Nontreated SF, SF+HAase, and SF+Trypsin were diluted to the following percentages using phosphate buffered saline (PBS) (Gibco, 10-010-023): 1%, 5 %, 50%, and 100% (undiluted) solutions for QCM-D, and 5% and 100% for SFA experiments.

**Quartz Crystal Microbalance with Dissipation (QCM-D).** In QCM-D measurements, a quartz crystal oscillator is set to oscillate at its resonance frequency. The shift in frequency due to the formation of an SF adsorption layer is typically 10-200 Hz. The frequency and dissipation changes can be related to the mass oscillating with the crystal and the viscoelastic properties of the layer through various models.<sup>35</sup>

**Surfaces Forces Apparatus (SFA).** The SFA allows to measure normal forces (e.g., forces due to the surface and liquid structure, polymer, steric) between macroscopic surfaces with high force sensitivity while simultaneously monitoring the absolute surface distance (film thickness) and contact shape.

A full detailed experimental protocol with all relevant equations and theoretical modeling of QCM-D and SFA can be found in the Supporting Information.

## RESULTS

### Film formation kinetics

The changes in surface mass density ( $\Delta\Gamma$ ) and dissipation ( $\Delta d$ ) during the adsorption, rinsing, and post-rinsing of nontreated SF, SF+HAase and SF+Trypsin to a silica oscillator at the four tested concentrations are shown in Figure 1 and SI Figure 1. We observed, as expected, that the time to reach the maximum surface mass density has a strong dependency on the SF dilution and does weakly depend on treatment of SF. We used a kinetic model, SI eq. 3, to quantitatively obtain saturation times ( $\tau$ ) at any given concentration, summarized in SI Table 1 and SI Figure 2. For all treatments,  $\tau$  decreased with increasing concentration. For nontreated SF, SF+HAase, and SF+Trypsin at one percent (1%),  $\tau$  values were  $3.4 \pm 1.9$  min,  $4.0 \pm 1.9$  min, and  $1.6 \pm 0.9$  min, respectively.  $\tau$  values decreased to  $2.0 \pm 1.1$  min for nontreated SF,  $2.1 \pm 0.9$  min for SF+HAase,  $0.7 \pm 0.1$  min for SF+Trypsin at five percent (5%). At 50%,  $\tau$  reached a minimum value of  $0.9 \pm 0.3$  min,  $0.9 \pm 0.2$  min, and  $0.9 \pm 0.5$  min and remained practically unchanged at 100%, being  $0.7 \pm 0.3$  min,  $0.9 \pm 0.3$  min,  $1.0 \pm 0.2$  min for nontreated SF, SF+HAase, and SF+Trypsin, respectively. The dissipation behavior of the films as a function of time followed an identical qualitative trend as what described for the change in surface mass density for all concentrations and treatments. Nontreated SF at 100% stands out from the rest of the conditions.  $\Delta\Gamma$  and  $\Delta d$  values decrease after reaching an almost instantaneous maxima, as shown in Figure 1(d). After the 30 minutes of experimental time, the film continues to experience molecular re-arrangements and has not reached a steady state/equilibrium. Most likely components with higher molecular weight (MW) and complexes are slowly pushed upward due to the oscillating surface in a phenomena that bears similarity to the vibration-induced granular segregation (or the Brazil nut effect),[37] combined with competing events of molecules with higher affinities to silica surface. Furthermore, SF+Trypsin presented an initial sharp peak, decreasing in amplitude with increasing concentration, which we attribute to fluid pressure gradients acting on the sensor, due to the lack of glycoproteins dissipating shear stresses.

Next, we rinsed nontreated SF, SF+HAase, and SF+Trypsin films with PBS to quantify the amount of SF components strongly physisorbed to the silica oscillator surface and the change in dissipation for each condition (treatment and concentration). After rinsing with PBS, the change in surface mass density and change in dissipation did not significantly shift for the lower concentrations, one percent and five percent of any of the treatments, summarized in SI Table 1 and denoted  $\Delta\Delta\Gamma$ . However, rinsing with PBS did considerably shift the change in surface mass

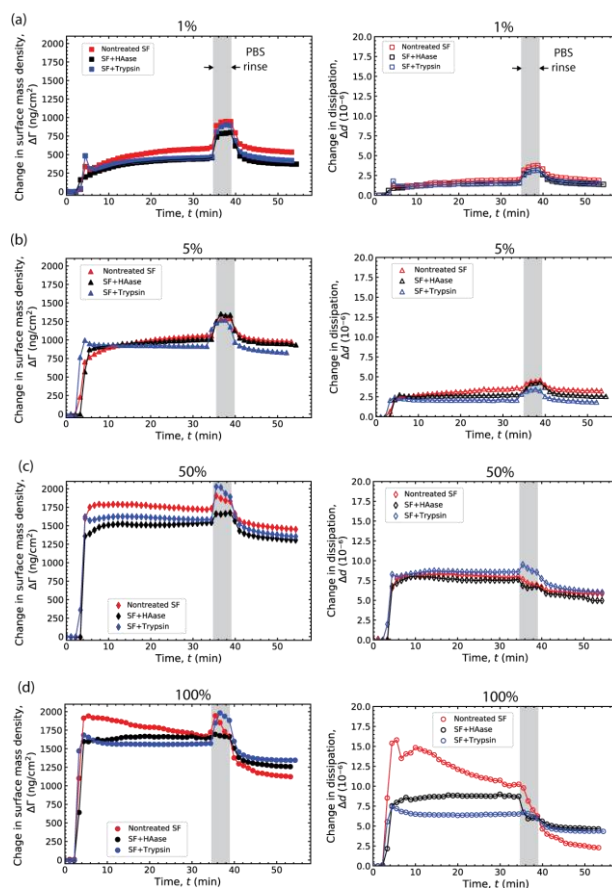

**Figure 1. Surface mass density and dissipation change during the adsorption of SF to silica.** (a) One percent (1%) in PBS, (b) five percent (5%) in PBS, (c) 50 percent (50%) in PBS, and (d) nondiluted (100%) nontreated SF (red), SF+HAase (black), and SF+Trypsin (blue). For clarity, only every 100<sup>th</sup> data point is shown.

density and change in dissipation to lower values for the two higher concentrations, 50% and 100% of nontreated SF, SF+HAase, and SF+Trypsin, as further described in the following section, *Langmuir adsorption isotherms*.

These results indicate that at 50% concentration, independent of the enzymatic treatment, a full film, strongly adhered to the silica oscillator surface has formed, and that a second weakly bound layer has started to build, which was easily removed by rinsing with PBS. Again, nontreated SF at 100% presented a unique behavior, as the dissipation after the PBS rinse dramatically shifted to very low values.

## Langmuir adsorption isotherms

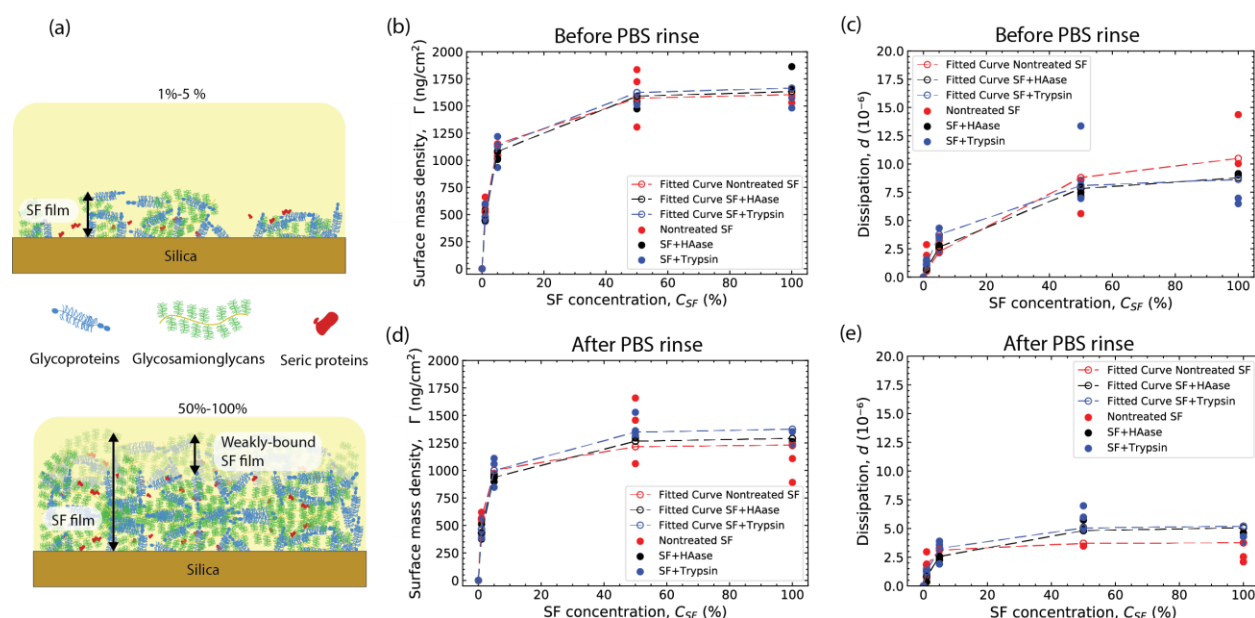

**Figure 2. Surface density and dissipation changes with SF concentration.** (a) Schematic representation of partially formed and fully formed SF films. (b) Surface density and (c) dissipation of tightly bound films and excess and (d) surface density and (e) dissipation of the tightly bound films left after PBS rinse by nontreated SF (red), SF+HAase (black), and SF+Trypsin (blue) before a PBS rinse. Dashed lines represent fitting curves for the Langmuir model, eq. 4.

To describe the coverage of molecules adsorbed onto the silica oscillator and the dissipation of the films formed as a function of SF concentrations, we used the Langmuir isotherm model, SI eq. 4, for nontreated SF, SF+HAase, and SF+Trypsin before and after a PBS rinse, Figure 2. Here, we report the surface mass densities ( $\Gamma$ ) and dissipation ( $d$ ) rather than  $\Delta\Gamma$  and  $\Delta d$  as we report the average over the last 20 data points, illustrated in SI Figure 3. The  $\Gamma$  were similar between treatments at all tested concentrations (1%, 5%, 50%, and 100%). These findings are not surprising, as the enzymes randomly cleave b-N-acetylhexosamine-glycosidic bonds in GAGs (HAase)[38] or proteins at the carboxyl side of Lys and Arg residues (Trypsin) and we did not extract the fragments. Interestingly, we found that the maximum surface mass density was reached with at least 50% nontreated SF, SF+HAase, or SF+Trypsin concentration, extending to a maximum value of  $\sim 1650$  ng/cm<sup>2</sup>, and did not increase with higher concentrations (*i.e.*, 100% SF, non-diluted). Instead, we expected differences between treatments in the dissipative properties of the films. At 1%, 5%, and 50% concentration, the dissipation values for all treatments were similar between them, increasing from  $\sim 2 \times 10^{-6}$  to  $\sim 3 \times 10^{-6}$  and finally to  $\sim 7.5 \times 10^{-6}$ . At the highest concentration (100%), however,  $d$  values were different for each treatment. For

nontreated SF,  $d$  values continued to increase, from  $7.5 \times 10^{-6}$  to  $10.0 \times 10^{-6}$ . SF+HAase also presented an increase in dissipation with increasing concentration, from  $7.5 \times 10^{-6}$  to  $9 \times 10^{-6}$ . For SF+Trypsin, the increase in  $d$  was similar to what was observed for SF+HAase, increasing from  $7.5 \times 10^{-6}$  to  $9 \times 10^{-6}$ . SI Table 3 summarizes these values. Collectively,  $\Gamma$  and  $d$  suggest that films formed at 1%, 5%, and 50% concentrations are very similar independent of treatment, but not at 100% concentration, despite having similar surface mass densities. These values indicate that the loosely bound molecules adsorbed onto the primary layer are most likely presenting differences in orientation, conformation, and/or grafting densities.

Next, rinsing with PBS to remove loosely bound molecules revealed a similar qualitative trend to what we observed and described for films before the rinsing step. 1% and 5% dilutions of nontreated SF, SF+HAase, and SF+Trypsin formed partial films with surface mass densities ( $\Gamma$ ) of  $\sim 500$  ng/cm<sup>2</sup> and  $\sim 1000$  ng/cm<sup>2</sup>, and  $d$  values of  $\sim 2.0 \times 10^{-6}$  and  $\sim 3.0 \times 10^{-6}$ , respectively. A fully formed, tightly bound film was reached with at least 50% nontreated SF, SF+HAase, or SF+Trypsin, with a measured  $\Gamma$  of  $\sim 1250$  ng/cm<sup>2</sup> and dissipation of  $\sim 5.0 \times 10^{-6}$ . At 100% nontreated SF, SF+HAase, and SF+Trypsin,  $\Gamma$  did not further increase and remained like what was measured at 50% for all three treatments,  $\sim 1250$  ng/cm<sup>2</sup>. The dissipation  $d$ , however, were not similar between treatments. We measured a  $d$  value of  $\sim 5.0 \times 10^{-6}$  for SF+HAase and SF+Trypsin, and a lower  $d$  for nontreated SF,  $\sim 4.0 \times 10^{-6}$ . The drop in  $d$  after the PBS rinse is an indication that the film is more rigid, possibly due to a different supramolecular assembly sequence of events, yielding a more compact and dense film, as further discussed in the *Discussion* section.

### Compliance of SF films

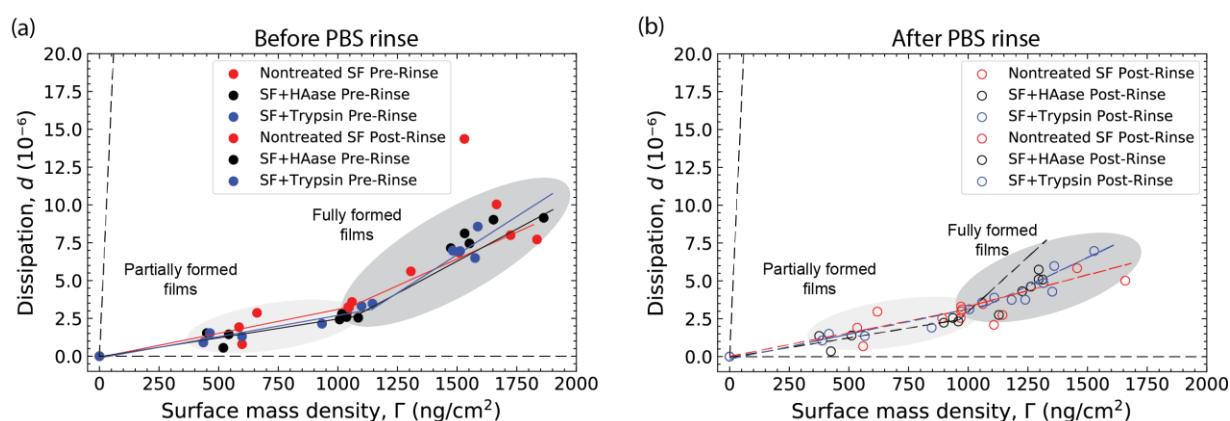

**Figure 3. Elastic component of the shear dependent compliance.** Change in dissipation as a function of surface density obtained for the adsorption of nontreated SF (red), SF+HAase (black), and SF+Trypsin (blue) for (a) before (filled circles) and (b) after (open circles) a PBS rinse.

For films that are stiffer than the surrounding liquid and considerably thinner than the penetration depth of the shear wave used ( $\sim 150$  nm for the third overtone,  $n = 3$ ), the elastic component of the shear dependent compliance ( $\nu$ ) can be obtained from SI eq. 2. Figure 3 shows  $d$  as a function of  $\Gamma$ . In this plot, we remove the symbol delta from the dissipation and surface mass density. These averaged values are not reported as a function of time but rather averaged values at well-defined time points of the measurement (*i.e.*, before rinsing step, end of the experiment). SI Figure 3 shows the region from which data points for the elastic component of the compliance was extracted. We identified two regimes for films before rinsing with PBS, Figure 3(a). A less compliant regime, corresponding to the partially formed films (high dilutions, 1% and 5%), and a more compliant regime for the fully formed films (low or no dilution, 50% and 100%).  $\nu$ , obtained

from SI eq. 2 and corresponding to the slopes in Figure 3 were  $3.2 \times 10^{-3} \text{ cm}^2/\text{ng}$ ,  $2.5 \times 10^{-3} \text{ cm}^2/\text{ng}$ , and  $2.8 \times 10^{-3} \text{ cm}^2/\text{ng}$  for nontreated SF, SF+HAase, and SF+Trypsin for partially formed films, respectively. Fully formed films, at concentrations of 50% and 100% were considerably more compliant, with  $\nu$  values of  $7.1 \times 10^{-3} \text{ cm}^2/\text{ng}$ ,  $8.5 \times 10^{-3} \text{ cm}^2/\text{ng}$ , and  $10.0 \times 10^{-3} \text{ cm}^2/\text{ng}$  for nontreated SF, SF+HAase, and SF+Trypsin. From these measurements, we observe that nontreated SF films are less compliant than SF+HAase and SF+Trypsin.

Next, we quantified  $\nu$  for films after a PBS rinsing step to remove loosely bound SF components and characterize the compliance of tightly bound films.  $\nu$  remained unchanged for partially formed films (1% and 5%),  $3.1 \times 10^{-3} \text{ cm}^2/\text{ng}$ ,  $2.5 \times 10^{-3} \text{ cm}^2/\text{ng}$ , and  $3.3 \times 10^{-3} \text{ cm}^2/\text{ng}$  for nontreated SF, SF+HAase, and SF+Trypsin, respectively. It was for fully formed films that we observed a considerable change in compliance. The rinsing step left behind a less compliant, tightly bound film with  $\nu$  being  $4.1 \times 10^{-3} \text{ cm}^2/\text{ng}$ ,  $2.5 \times 10^{-3} \text{ cm}^2/\text{ng}$ , and  $7.5 \times 10^{-3} \text{ cm}^2/\text{ng}$  for nontreated SF, SF+HAase, and SF+Trypsin, respectively. These results suggest that SF fluid films, independently of treatment, form films with a compliance gradient, being less compliant at the substrate interface, and become more compliant at the bulk SF interface. The effect of treatment changes the magnitude of the gradient.

### Normal interaction forces between mica surfaces across undiluted SF

To determine the effect of the enzymatic treatments on the load-bearing properties of SF, we used the SFA to measure normal forces between undiluted (100%) nontreated SF, SF+HAase, or SF+Trypsin. Figure 4(a) shows the experimental schematic and representative force-distance profiles for SFs. Figure 4(b)-(e) and SI Figure 4 displays normal forces, reported as  $F/R$ ,  $F$  being the normal force and  $R$  the surface radius of curvature as a function of the surface separation distance,  $D$ . For all treatments, the force-distance profiles were purely repulsive, but the range and the magnitude of the repulsion depended on the enzymatic treatment and loading/unloading history. Figure 4(b)-(e) compares forces measured for nontreated SF (red curves), SF+HAase (black curves), and SF+Trypsin (blue curves) for subsequent measurements performed on the same location, with 10 min waiting period between measurement. There are qualitative and quantitative differences between force curves. For the first loading/unloading cycle, Figure 4(b), the onset of repulsion,  $D_0$ , for all conditions occurs at  $\sim 210 \text{ nm}$ , equivalent to two SF relaxed films, and increases monotonically with decreasing separation. For untreated SF, at a distance less than  $\sim 50 \text{ nm}$ , the forces increased sharply, but the substrates never deformed/flattened, reaching a hardwall (HW) at  $\sim 40 \text{ nm}$ , equivalent to two compressed SF films. During unloading, the force-distance profile followed the trajectory of the loading curve, indicating no hysteresis. For SF+HAase, the repulsion continued to increase monotonically with decreasing separation, until reaching a HW at  $\sim 40 \text{ nm}$ , like nontreated SF. During unloading, however, forces initially decreased sharply, and transitioned to a monotonic force decay at  $\sim 50 \text{ nm}$ , showing a significant hysteresis between loading and unloading. For SF+Trypsin, the repulsion increased monotonically with decreasing separation, until reaching a critical thickness,  $\sim 90 \text{ nm}$  at which the forces increased sharply, followed by a monotonic increase, resembling a sigmoidal curve, reaching a HW at  $\sim 60 \text{ nm}$ . During unloading, forces decreased sharply, but followed the loading curve trajectory afterwards. The behavior observed for SF+HAase and SF+Trypsin suggests that the films experience a molecular re-arrangement due to confinement, that was not observed for nontreated SF.

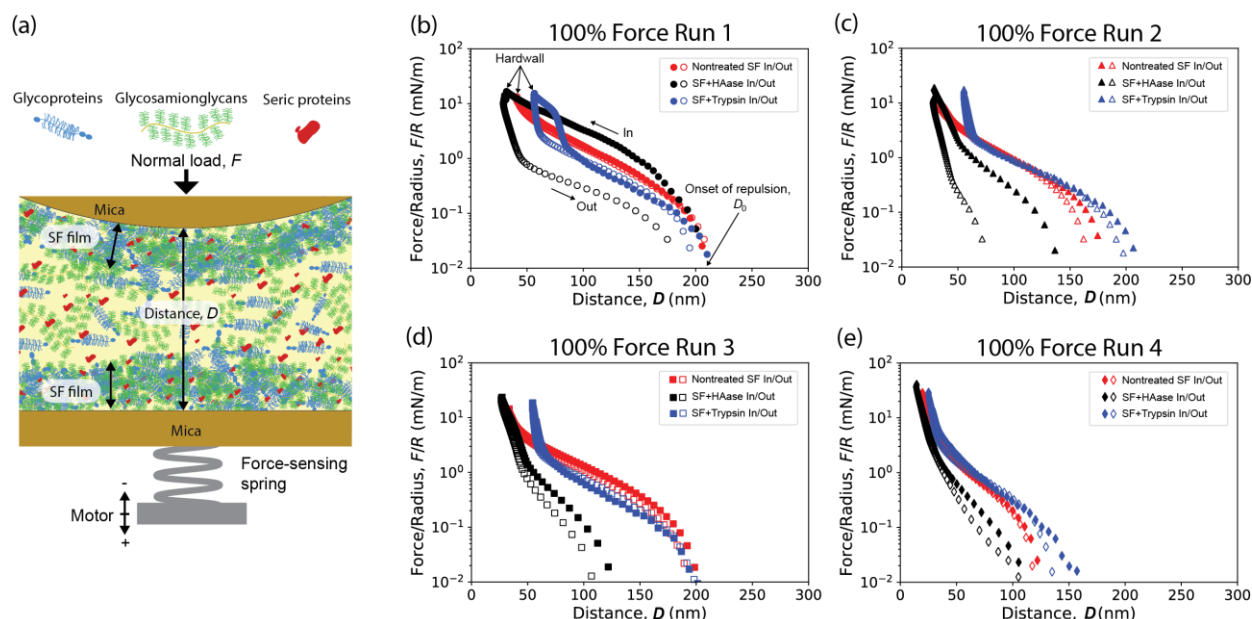

**Figure 4. Comparison of normal interaction forces between two mica surfaces across nondiluted SF.** All conditions were purely repulsive, and no adhesion was measured. (a) Schematic of the SFA and cartoon representing the main SF components forming a film and confined between mica surfaces. Profiles of the loading (in, filled symbols) and unloading (out, open symbols) for (b) first cycle, (c) second cycle, (d) third cycle, and (e) fourth cycle of nontreated SF, SF+HAase, and SF+Trypsin.

Subsequent loading and unloading cycles in the same location were very similar to the first loading and unloading cycle for nontreated SF, with no change in the onset of repulsion ( $D_0$ ), hard wall (HW), and unloading, Figure 4(c) and (d) and SI Figure 4(a). That was not the case for SF+HAase, Figure 4 (c) and (d) and SI Figure 4(b).  $D_0$  shifted from  $\sim 210$  nm to  $\sim 150$  nm, the force-distance curve of the second compression cycle followed the first unloading force-distance curve very closely, followed by an unloading curve that showed, once again, significant hysteresis. The described behavior repeated for the third loading cycle, with the  $D_0$  shifting from  $\sim 150$  nm to  $\sim 125$  nm, however less loading/unloading hysteresis was detected. The substrates never deformed/flattened for this condition. Lastly, for SF+Trypsin, the second and third loading/unloading cycles were almost identical between them, as well as to the unloading force-distance curve of the first compression cycle. That is,  $D_0$  started at  $\sim 210$  nm increasing monotonically with decreasing separation. At a distance less than  $\sim 65$  nm, the forces increased sharply, but the substrates never deformed/flattened, reaching a HW at  $\sim 60$  nm, equivalent to two compressed SF+Trypsin films. The behavior observed for SF+HAase suggests that the films continue to experience molecular re-arrangements due to confinement, which was no longer observed for nontreated SF and SF+Trypsin at similar compression forces and compression rates. Alternatively, it could be possible that by leaving the SF films under an applied load (rather than controlling force) for a finite time, films could experience molecular re-arrangement as well, leading to similar hysteresis. This hypothesis will have to be investigated in future studies.

To test if molecular film re-arrangement continued with higher applied normal forces, we manually compressed ( $F/R > 200$  mN/m) nontreated SF, SF+HAase, and SF+Trypsin films until clear flattening occurred, followed by a final motor-controlled loading-unloading cycle, 10 minutes after manual compression. All conditions experienced plastic/viscoelastic deformation, observed by a shift in  $D_0$  to smaller distances. Nontreated SF decreased to  $\sim 125$  nm, SF+HAase decreased to  $\sim 100$  nm, and SF+Trypsin decreased to  $\sim 150$  nm, Figure 4(e). HW values decreased to  $\sim 50\%$  of

the initially measured HW (FR 1), to ~20 nm, ~25 nm, and ~40 nm for nontreated SF, SF+HAase, and SF+Trypsin, respectively.

To understand the origin of the repulsive interactions described above, "In" force-distance profiles (filled symbols) shown in Figure 4 were fitted with the Alexander-de Gennes (AdG) model, SI eq. 5. Experimental data and fits are shown in SI Figure 5 and fitted parameters summarized in SI Table 4. Our results confirmed that normal forces between two mica surfaces across nontreated SF can be well described by the AdG model, as previously reported.[6,39] For this model, the average effective brush thickness  $L = D_0/2$ , corresponding to a brush on each mica surface. The average effective brush thickness ( $L$ ) and average effective grafting distance ( $s$ ) values were  $93 \pm 6$  nm and  $0.6 \pm 0.01$  nm, respectively. Based on the coefficient of determination ( $r^2$ ) from our non-linear least-squares regression of the AdG model, we observed that the prediction as a brush decreases for SF+HAase ( $r^2 = 0.95 \pm 0.02$ ) and SF+Trypsin ( $r^2 = 0.88 \pm 0.07$ ) when compared against nontreated SF ( $r^2 = 0.98 \pm 0.01$ ). The average  $L$  and  $s$  values increase to  $125 \pm 23$  nm and  $0.47 \pm 0.08$  nm for SF+HAase, and  $107 \pm 14$  nm  $0.54 \pm 0.07$  nm, for SF+Trypsin, respectively. These results, combined with the force-distance profile shapes, clearly demonstrate that nontreated SF, SF+HAase, and SF+Trypsin form films on silica that respond differently to confinement (compression) due to differences in the supramolecular assembly.

To further describe the repulsive behavior of mica across nontreated SF, SF+HAase, and SF+Trypsin, we additionally used the Dolan and Edwards (DnE) model, SI eq. 6. Experimental data and fits are shown in SI Figure 5 and summarized in SI Table 4 as well. The fitted decay length,  $R_{\text{eff}}$ , increased as follows: SF+Trypsin ( $9.5 \pm 8.0$  nm), followed by nontreated SF ( $19 \pm 5.0$  nm), and SF+HAase ( $663 \pm 1100$  nm). The pre-factor  $A$ , which quantifies the amplitude of the repulsion, varied considerably between treatments, an indicator of the load-bearing capability of the films, and increased as follows: Nontreated SF ( $84 \pm 26$  nm), followed by SF+HAase ( $1320 \pm 1070$  nm), and lastly SF+Trypsin ( $1,228,045 \pm 1,087,503$  nm).

### **Normal interaction forces between mica surfaces across diluted (5%) SF**

Next, based on the Langmuir adsorption isotherm results, we asked how partially formed films would respond to confinement. We investigated the interaction forces of mica across 5% nontreated SF, SF+HAase, and SF+Trypsin using the SFA. While little to no hysteresis was observed for 5% nontreated SF and for 5% SF+HAase either between in (loading) and out (unloading) or between cycles (Force Run 1-3), 5% SF+Trypsin showed considerable hysteresis, between in/out (loading/unloading) and between cycles (Force Runs). Interestingly,  $D_0$  for Force Run 2 and 3 were very close to the termination of interaction of Force Run 1 and 2, respectively. This observation suggests that the film has undergone long-term molecular rearrangement, SI Figure 5 and SI Figure 6.

Similar to what performed for 100% and based on the coefficient of determination ( $r^2$ ) from our least-squares regression of the AdG and DnE models, summarized in SI Table 5, we observe that the prediction of the confinement force normalized by the radius of curvature as a function of the separation distance is more accurately described as an end-grafted polymer in the mushroom regime for films formed with diluted (5%) SF solutions.

## DISCUSSION

The main goal of this study was to examine the effects of two enzymatic treatments on the formation and shear-dependent compliance of SF nano-films, and interaction forces of macroscopic surfaces across SF adsorbed to oxide surfaces (e.g., silica and mica). SF components known to contribute to the load-bearing, wear protection, and lubrication of articular cartilage surfaces were digested using GAG and protein specific enzymes. We used HAase to depolymerize HA. However, it is very likely that other GAGs, such as chondroitin sulfate were also degraded, given the structural similarity. In fact, it has been reported that HAases have strong hydrolytic activity toward chondroitin sulfate comparable to that for HA.[40] To cleave SF proteins, we used trypsin, a protease that reacts with peptide bonds between carboxylic acid groups of lysine or arginine and the amino group of the adjacent amino acid residue, with its efficacy depending on the tertiary and quaternary protein structure, as some of the peptide bonds may become inaccessible.[41] This treatment is effective on large glycoproteins, such as lubricin[7,30] but will also target smaller glyco- and globular proteins, like decorin and albumin, respectively, however less efficient on the latter given its compact structure. Osteo- and rheumatoid-arthritis SFs have been shown to present, with varying concentrations, enzymes such as cathepsin,[42,43] plasmin,[44,45] and higher HAase activity compared to that of healthy SFs.[46] Cartilage from human femoral head has a reported surface charge density of 37 mC/m<sup>2</sup>,[47] which is within range to that for silicates, 3.2-80 mC/m<sup>2</sup> used in this study.[48,49] Therefore, findings reported here can provide insights into the formation of films by healthy (nontreated SF) or pathophysiologic SFs (SF+HAase or SF+Trypsin) on either implanted surfaces (e.g., oxides) or the reformation of torn lamina splendens on the articular cartilage surface.

At low concentrations (1-5%), film-formation kinetics results revealed that only trypsin altered the characteristic saturation time, decreasing it by a factor of two, SI Figure 2 and SI Table 1. This could be due to the smaller radius of gyration of the peptide fragments combined with the positively charged ends (arginine and lysine), leading to a faster migration and adsorption to the negatively charged silica and mica surfaces. Adhesion studies of small molecules having cationic amino acids, in particular lysine, have been proposed to drive electrostatic adsorption to mica surfaces in high ionic strength environments ( $I \approx 150$  mM).[50,51] The fact that the saturation times for nontreated SF and SF+HAase are similar suggests that glycoproteins, such as lubricin, which carry two positively charged globular end-domains, could be driving the adsorption process. At higher concentrations, however, the main adsorption mechanisms are dominated by bulk transport, as the saturation time for all treatments tested are similar. Bulk transport has been observed for human serum albumin studies adsorbed to silica resonators using QCM-D at concentrations 5-10 mg/ml, equivalent to the concentrations found in SF (our 50% and 100% dilutions, respectively).[39,52] However, given the complex composition of SF, different processes such as desorption/adsorption, competitive exchange, and exchange via transient complex formation will also participate in the film formation and maintenance of the film.

SF is known to be rheopectic at low shear rates but shear-thinning at high shear rates.[6,53] We observed rheopectic behavior for nontreated SF and SF+HAase, but not for SF+Trypsin, for which we quantified shear-thinning response only, SI Figure 8. We also quantified the bulk refractive index of SFs and did not find a correlation between refractive index and treatment, SI Figure 9.

From the Langmuir adsorption isotherms, Figure 2, we observed that full film formation is achieved with at least 50% SF concentrations for all treatments. This observation could be interpreted as a protection mechanism to ensure instantaneous surface saturation to reform a

protecting film, even if local concentration variations are present due to, for example, large depletion forces driven by external macroscopic factors (e.g., locomotion).[54] Furthermore, this film could be an essential precursor step for the formation of the lamina splendens,[6,7] which has been implicated in providing wear protection and lubrication,[6,55,56] as well as regulating the permeability and compression resistance of the superficial layers of cartilage.[57] Films, regardless of treatment and concentration, consist of a strongly adsorbed layer, followed by a second loosely bound layer that could be easily removed by rinsing with PBS. The pre-rinse and post-rinse films showed mechanical differences between them, Figure 3, most likely because of structural, compositional, and hydration differences. Pre-rinse films did not reveal apparent differences between treatments in their shear-dependent compliance, but confinement showed significant differences in the interaction forces, Figure 4. A mechanical analogy describing the film responses during confinement is as follows: for nontreated SF films, we observed a dominant elastic response (for the investigated loading/unloading rates and forces applied), which could be modeled as a series of parallel one-dimensional springs. In our configuration, the film dimensions ( $L \approx 100$  nm) are considerably thinner than the contact diameter ( $\Theta > 10$   $\mu$ m). That is, the film thicknesses are at least two orders of magnitude smaller than the contact diameter. For these conditions, the multi-spring model, the Winkler model, can be used. Other studies have used it to approximate the compression forces of hydrogels[58] and protein films.[59] The springs have a specified compression range, corresponding to the indentation. For a compression spring, the stiffness is determined by the number of active coils per unit length, the diameter of the coil, and the diameter of the wire. SF+Trypsin films can be modeled with the same spring (*i.e.*, identical coils per unit length, coil diameters, and wire diameters) as the nontreated SF films, however, with a shorter compression range, as the compression force-distance initial slope is very similar as the nontreated SF until approximately 65 nm, where the force rapidly increases. This response would correspond to the bottoming or full compression of the spring. We propose to describe the compression of SF+HAase films as a series of dashpots in parallel, as the force-distance profiles showed a significant hysteresis with no recovery during experimental time scales, which could be due to the molecular re-arrangements leading to enhanced hydrophobic interactions favored by confinement, overcoming entropic stabilization driven by excluded volume. The mechanical analogies for the films are schematized in Figure 6. The AdG and DnE model described well the interaction forces of mica surfaces across SFs, and suggest that the elastic films (nontreated SF) are better modeled as fully swollen polymer brushes and that enzyme treated SFs films (SF+HAase and SF+Trypsin) are better modeled as polymer mushrooms.

It is interesting to note that HA and its complexes provided stiffness to the tested films under confinement, while lubricin and other glycoproteins provided an extended elastic range. It is well documented that HA regulates the viscosity of SF in bulk, and mediates elastoviscous lubrication.[21] On the other hand, lubricin is now accepted as the main molecule mediating boundary lubrication.[14] However, building body of evidence suggests that the synergistic surface interactions of SF components are responsible for the extremely efficient wear protection and lubrication properties of articular cartilage surfaces,[19,23,27,29] and that the film can strongly affect the rheological and tribological behaviors of viscosupplements.[19,21,60] Based on these reports, it is crucial to understand and identify the precursor films' properties (e.g., chemical make-up, stiffness, roughness, etc.).

Elasticity and robustness of nontreated SF films is desired. For example, synovial joint situations in which the tangential velocity is very small or zero (the investigated condition) are "heel-strike" or "toe-off". In the absence of relative motion between the interacting surfaces (e.g., apposing

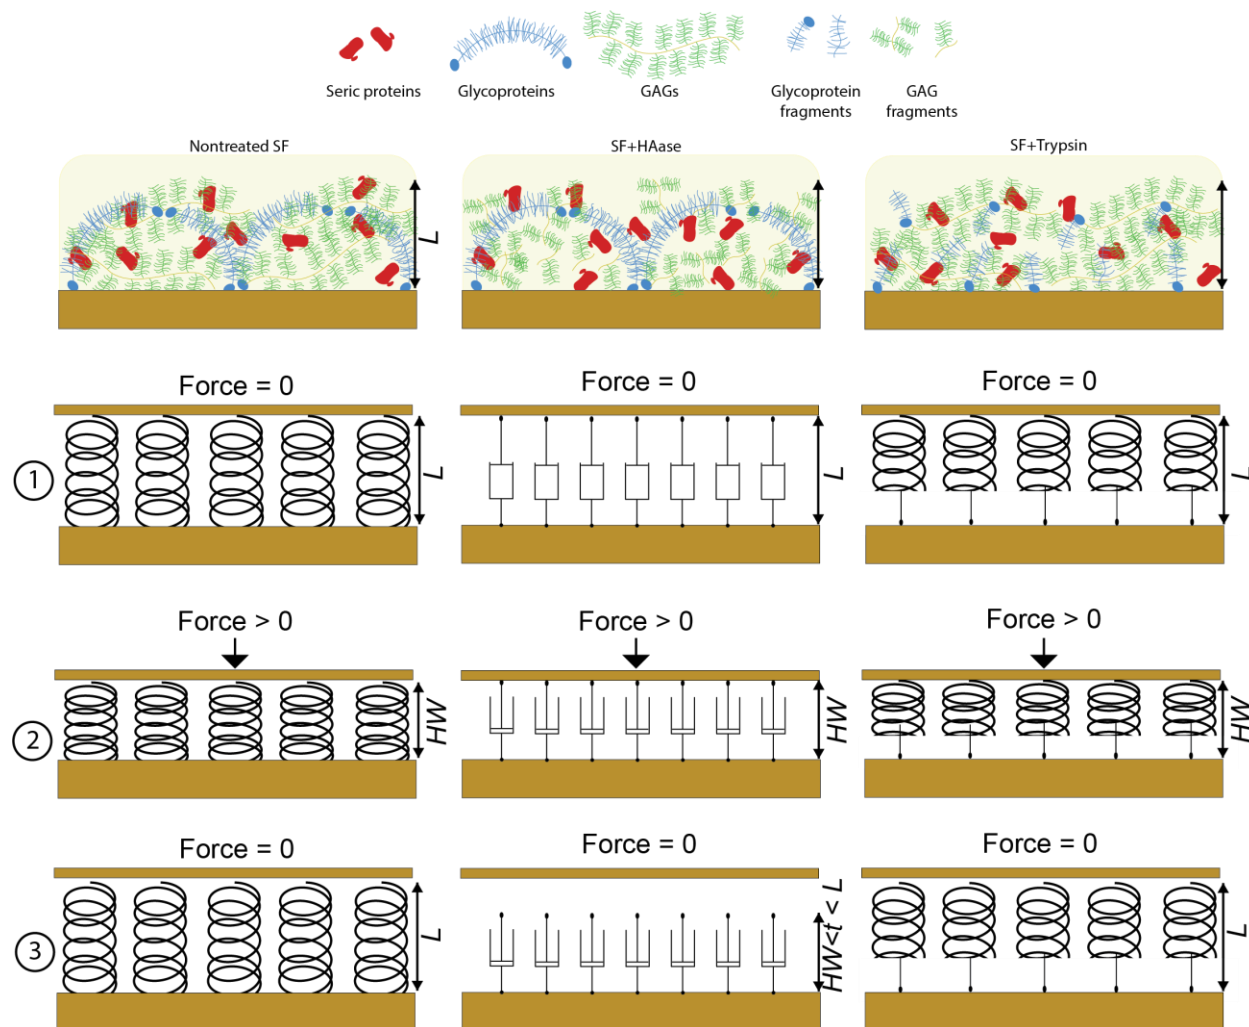

**Figure 6. Mechanical model for SF films.** (a) nontreated SF with the mechanical spring model – long spring, (b) SF+HAase with the mechanical dashpot model, and (c) SF+Trypsin with the mechanical spring model – short spring. (1) shows the initial “in rest” configuration of the SF films, where the thickness is equivalent to  $D_0$ . (2) represents the maximum applied force configuration, reaching a film thickness equivalent to the  $HW$ . (3) corresponds to the configuration of the films after removing the applied load.

cartilage surfaces), hydrodynamic or elasto-hydrodynamic lubrication cannot exist, and the surfaces experience pure normal loads. A study in the 50's reported that SF has a special capacity for forming a layer with some degree of elasticity.[5] Here, we report that both biomolecules (or more broadly, GAGs and proteins in SF) are crucial for the proper load-bearing properties of films, and that nontreated SF films have some degree of elasticity indeed.

Furthermore, we report that by digesting GAGs or proteins, the elasticity is removed or reduced, respectively. These findings emphasize the importance of the synergistic interactions of SF components not only for the lubrication and wear protection of the surfaces (natural or synthetic), as reported extensively, but also for the proper load-bearing properties of the film. Indeed, it can be the poor load-bearing capabilities of the films that lead to improper lubrication. Even more, the combined effects could then lead to excessive interstitial fluid pressurization,[61,62] essential to the load-bearing and lubrication properties of articular cartilage. While effects of loading/unloading rates, contact times, contact loads, are all important parameters to fully understand the

mechanisms of SF films under confinement and the effect of enzymatic treatments, it is beyond the focus of this study and is being systematically investigated.

Oxides such as alumina and ultra-high molecular weight polyethylene (UHMWPE) are frequently used for artificial joint surfaces, due to their mechanical properties, biocompatibility, and good tribological performance. A well-known failure mode in artificial joints is due to the release of UHMWPE wear particles leading to abrasion or release of metal and metal oxide ions due to tribocorrosion, both activating adverse biological responses.[63–65] Surface functionalization approaches, such as grafting of polymer brushes or plasma treatments to modify surface charge and control adsorption of SF components has been intensively investigated in the last decade, with the goal of enhancing the tribological performance of the interacting implant surfaces.[66,67] By controlling the adsorption of SF components, it could become possible to tune the tribolayer that forms at the surface of implanted joints. These layers have been suggested to improve load distribution imposed by the orthopedic implant.[68] If the initially formed films on implant surfaces is built by pathological SF, as modeled here by enzymatic treatments, it is clear that the load distribution of the films would be not as efficient as that of films formed by healthy SF, potentially leading to a poor tribolayer formation. Given that implants, such as total hip or knee replacements are commonly placed in patients that have synovial joint pathophysiology, understanding how SF components interact with surfaces is of crucial interest to identify the suitable surface functionalization strategies that yield SF films with the desired physico-chemical properties.

## CONCLUSIONS

Collectively, our results suggest that SF forms fully saturated films at concentrations of at least 50% of what is found at physiological concentrations, and that the removal of the excess layer exposes differences in the shear dependent elastic component of compliance of the different SF films. Furthermore, we find that the absence of either GAGs or proteins abolishes the load-bearing capabilities, and that the loading curves can be well described by two simple models from polymer physics used to describe the interaction forces of endgrafted polymer chains, de Alexander-de Gennes (AdG) and the Dolan and Edwards (DnE) models. The findings reported can be of relevance to understanding the formation of protecting films on cartilage or implant surfaces and emphasize the importance of load-bearing properties of these SFs under confinement in addition to the tribological characterization, to fully understand the supramolecular assemblies and synergistic interactions of SF components.

## CONFLICTS OF INTEREST

No conflicts of interest to declare.

## ACKNOWLEDGMENTS

R.C.A.E, A.S.M., and A.M.S. acknowledge funding from the NSF-CREST:Center for Cellular and Biomolecular Machines through the support of the National Science Foundation (NSF) Grant No. NSF-HRD-1547848). R.C.A.E. acknowledges funding from the NASA Merced nAnomaterials Center for Energy and Sensing (MACES) through the support of the National Aeronautics and Space Administration (NASA) Grant No. NNX15AQ01. A.M.S. and A.G. acknowledge funding from the career grant NSF CBET 2047210 awarded to A.G.

## REFERENCES

- [1] M. Qadri, G.D. Jay, L.X. Zhang, H. Richendrfer, T.A. Schmidt, K.A. Elsaid, Proteoglycan-4 regulates fibroblast to myofibroblast transition and expression of fibrotic genes in the synovium, *Arthritis Res. Ther.* 22 (2020) 113.
- [2] J.P. Gleghorn, A.R.C. Jones, C.R. Flannery, L.J. Bonassar, Boundary mode lubrication of articular cartilage by recombinant human lubricin, *J. Orthop. Res.* 27 (2009) 771–777.
- [3] C.S. Manasa, S.M. Silva, P.E. Desroches, J. Dennaoui, M.J. Russo, M. Han, A.F. Quigley, G.W. Greene, R.M.I. Kapsa, S.E. Moulton, Lubricin as a tool for controlling adhesion in vivo and ex vivo, *Biointerphases.* 16 (2021) 020802.
- [4] D.K. Rhee, J. Marcelino, M. Baker, Y. Gong, P. Smits, V. Lefebvre, G.D. Jay, M. Stewart, H. Wang, M.L. Warman, J.D. Carpten, The secreted glycoprotein lubricin protects cartilage surfaces and inhibits synovial cell overgrowth, *J. Clin. Invest.* 115 (2005) 622–631.
- [5] A.G. Ogston, J.E. Stanier, The physiological function of hyaluronic acid in synovial fluid; viscous, elastic and lubricant properties, *J. Physiol.* 119 (1953) 244–252.
- [6] X. Banquy, D.W. Lee, S. Das, J. Hogan, J.N. Israelachvili, Shear-Induced Aggregation of Mammalian Synovial Fluid Components under Boundary Lubrication Conditions, *Adv. Funct. Mater.* 24 (2014) 3152–3161.
- [7] S.G. Cook, Y. Guan, N.J. Pacifici, C.N. Brown, E. Czako, M.S. Samak, L.J. Bonassar, D. Gourdon, Dynamics of Synovial Fluid Aggregation under Shear, *Langmuir.* (2019) 1–10.
- [8] W.A. Hodge, R.S. Fijan, K.L. Carlson, R.G. Burgess, W.H. Harris, R.W. Mann, Contact pressures in the human hip joint measured in vivo, *Proc. Natl. Acad. Sci. U. S. A.* 83 (1986) 2879–2883.
- [9] D.W. Lee, X. Banquy, S. Das, N. Cadirov, G. Jay, J. Israelachvili, Effects of molecular weight of grafted hyaluronic acid on wear initiation, *Acta Biomater.* 10 (2014) 1817–1823.
- [10] R. Tadmor, N. Chen, J.N. Israelachvili, Thin film rheology and lubricity of hyaluronic acid solutions at a normal physiological concentration, *J. Biomed. Mater. Res.* 61 (2002) 514–523.
- [11] M. Benz, N. Chen, J. Israelachvili, Lubrication and wear properties of grafted polyelectrolytes, hyaluronan and hylan, measured in the surface forces apparatus, *Journal of Biomedical Materials Research - Part A.* 71 (2004) 6–15.
- [12] S.N. Innes-Gold, J.P. Berezney, O.A. Saleh, Single-Molecule Stretching Shows Glycosylation Sets Tension in the Hyaluronan-AggreCAN Bottlebrush, *Biophys. J.* 119 (2020) 1351–1358.
- [13] S.R. Inamdar, E. Barbieri, N.J. Terrill, M.M. Knight, H.S. Gupta, Proteoglycan degradation mimics static compression by altering the natural gradients in fibrillar organisation in cartilage, *Acta Biomater.* 97 (2019) 437–450.
- [14] B. Zappone, M. Ruths, G.W. Greene, G.D. Jay, J.N. Israelachvili, Adsorption, lubrication, and wear of lubricin on model surfaces: polymer brush-like behavior of a glycoprotein, *Biophys. J.* 92 (2007) 1693–1708.
- [15] J. Schurz, V. Ribitsch, Rheology of synovial fluid, *Biorheology.* 24 (1987) 385–399.
- [16] B. Zappone, G.W. Greene, E. Oroudjev, G.D. Jay, J.N. Israelachvili, Molecular aspects of boundary lubrication by human lubricin: effect of disulfide bonds and enzymatic digestion, *Langmuir.* 24 (2008) 1495–1508.
- [17] B. a. Hills, B.D. Butler, Phospholipids identified on the pericardium and their ability to impart boundary lubrication, *Ann. Biomed. Eng.* 13 (1985) 573–586.
- [18] T.A. Schmidt, Lubricating lipids in hydrogels, *Science.* 370 (2020) 288–289.
- [19] S. Das, X. Banquy, B. Zappone, G.W. Greene, G.D. Jay, J.N. Israelachvili, Synergistic Interactions between Grafted Hyaluronic Acid and Lubricin Provide Enhanced Wear Protection and Lubrication, *Biomacromolecules.* 14 (2013) 1669–1677.

- [20] D.P. Chang, N.I. Abu-lail, J.M. Coles, F. Guilak, D. Gregory, S. Zauscher, Friction Force Microscopy of Lubricin and Hyaluronic Acid between Hydrophobic and Hydrophilic Surfaces, *Soft Matter*. 5 (2009) 3438–3445.
- [21] E.D. Bonnevie, D. Galesso, C. Secchieri, I. Cohen, L.J. Bonassar, Elastoviscous Transitions of Articular Cartilage Reveal a Mechanism of Synergy between Lubricin and Hyaluronic Acid, *PLoS One*. 10 (2015) e0143415.
- [22] J. Seror, L. Zhu, R. Goldberg, A.J. Day, J. Klein, Supramolecular synergy in the boundary lubrication of synovial joints, *Nat. Commun.* 6 (2015) 6497.
- [23] L. Zhu, J. Seror, A.J. Day, N. Kampf, J. Klein, Ultra-low friction between boundary layers of hyaluronan-phosphatidylcholine complexes, *Acta Biomater.* 59 (2017) 283–292.
- [24] J. Yu, X. Banquy, G.W. Greene, D.D. Lowrey, J.N. Israelachvili, The boundary lubrication of chemically grafted and cross-linked hyaluronic acid in phosphate buffered saline and lipid solutions measured by the surface forces apparatus, *Langmuir*. 28 (2012) 2244–2250.
- [25] C. Liu, M. Wang, J. An, E. Thormann, A. Dédinaite, Hyaluronan and phospholipids in boundary lubrication, *Soft Matter*. 8 (2012) 10241.
- [26] H.L. Reesink, E.D. Bonnevie, S. Liu, C.R. Shurer, M.J. Hollander, L.J. Bonassar, A.J. Nixon, Galectin-3 Binds to Lubricin and Reinforces the Lubricating Boundary Layer of Articular Cartilage, *Sci. Rep.* 6 (2016) 25463.
- [27] J. Seror, Y. Merkher, N. Kampf, L. Collinson, A.J. Day, A. Maroudas, J. Klein, Normal and Shear Interactions between Hyaluronan–Aggrecan Complexes Mimicking Possible Boundary Lubricants in Articular Cartilage in Synovial Joints, *Biomacromolecules*. 13 (2012) 3823–3832.
- [28] J. Seror, Y. Merkher, N. Kampf, L. Collinson, A.J. Day, A. Maroudas, J. Klein, Articular cartilage proteoglycans as boundary lubricants: structure and frictional interaction of surface-attached hyaluronan and hyaluronan–aggrecan complexes, *Biomacromolecules*. 12 (2011) 3432–3443.
- [29] T. a. Schmidt, N.S. Gastelum, Q.T. Nguyen, B.L. Schumacher, R.L. Sah, Boundary lubrication of articular cartilage: role of synovial fluid constituents, *Arthritis Rheum.* 56 (2007) 882–891.
- [30] G.D. Jay, J.R. Torres, M.L. Warman, M.C. Laderer, K.S. Breuer, The role of lubricin in the mechanical behavior of synovial fluid, *Proc. Natl. Acad. Sci. U. S. A.* 104 (2007) 6194–6199.
- [31] K.K. Kanazawa, J.G. Gordon, Frequency of a Quartz Microbalance in Contact with Liquid, *Anal. Chem.* 57 (1985) 1770–1771.
- [32] K. Keiji Kanazawa, J.G. Gordon, The oscillation frequency of a quartz resonator in contact with liquid, *Anal. Chim. Acta.* 175 (1985) 99–105.
- [33] R. Beck, U. Pittermann, K.G. Weil, Impedance analysis of quartz oscillators, contacted on one side with a liquid, *Ber. Bunsenges. Phys. Chem.* 92 (1988) 1363–1368.
- [34] D. Johannsmann, A. Langhoff, C. Leppin, Studying Soft Interfaces with Shear Waves: Principles and Applications of the Quartz Crystal Microbalance (QCM), *Sensors* . 21 (2021). <https://doi.org/10.3390/s21103490>.
- [35] G.D. Degen, T.R. Cristiani, N. Cadirov, R.C. Andresen Eguiluz, K. Kristiansen, A.A. Pitenis, J.N. Israelachvili, Surface Damage Influences the JKR Contact Mechanics of Glassy Low-Molecular-Weight Polystyrene Films, *Langmuir*. 35 (2019). <https://doi.org/10.1021/acs.langmuir.9b02037>.
- [36] J. Israelachvili, Thin film studies using multiple-beam interferometry, *J. Colloid Interface Sci.* 44 (1973) 259–272.
- [37] D.A. Huerta, J.C. Ruiz-Suárez, Vibration-Induced Granular Segregation: A Phenomenon Driven by Three Mechanisms, *Phys. Rev. Lett.* 92 (2004) 114301.

- [38] K. Lemmnitzer, J. Schiller, J. Becher, S. Möller, M. Schnabelrauch, Improvement of the digestibility of sulfated hyaluronans by bovine testicular hyaluronidase: a UV spectroscopic and mass spectrometric study, *Biomed Res. Int.* 2014 (2014) 986594.
- [39] R.C. Andresen Eguiluz, S.G. Cook, C.N. Brown, F. Wu, N.J. Pacifici, L.J. Bonassar, D. Gourdon, Fibronectin mediates enhanced wear protection of lubricin during shear, *Biomacromolecules*. 16 (2015). <https://doi.org/10.1021/acs.biomac.5b00810>.
- [40] T. Honda, T. Kaneiwa, S. Mizumoto, K. Sugahara, S. Yamada, Hyaluronidases Have Strong Hydrolytic Activity toward Chondroitin 4-Sulfate Comparable to that for Hyaluronan, *Biomolecules*. 2 (2012) 549–563.
- [41] K. Murugesh Babu, 5 - The dyeing of silk, in: K. Murugesh Babu (Ed.), *Silk*, Woodhead Publishing, 2013: pp. 117–139.
- [42] S. Huang, K.A. Thomsson, C. Jin, S. Alweddi, A. Struglics, O. Rolfson, L.I. Björkman, S. Kalamajski, T.A. Schmidt, G.D. Jay, R. Krawetz, N.G. Karlsson, T. Eisler, Cathepsin g Degrades Both Glycosylated and Unglycosylated Regions of Lubricin, a Synovial Mucin, *Sci. Rep.* 10 (2020) 1–12.
- [43] J. Miyata, K. Tani, K. Sato, S. Otsuka, T. Urata, B. Lkhagvaa, C. Furukawa, N. Sano, S. Sone, Cathepsin G: the significance in rheumatoid arthritis as a monocyte chemoattractant, *Rheumatol. Int.* 27 (2007) 375–382.
- [44] F. Carmassi, F. De Negri, M. Morale, R. Puccetti, S.I. Chung, Elastase- and plasmin-mediated fibrinolysis in rheumatoid arthritis, *Int. J. Tissue React.* 16 (1994) 89–93.
- [45] E. Zastawna, W. Drewniak, W. Powierza, D. Rość, A. Michalski, M. Kotschy, Post-traumatic plasminogenesis in intraarticular exudate in the knee joint, *Med. Sci. Monit.* 8 (2002) CR371–CR378.
- [46] H. Nagaya, T. Ymagata, S. Ymagata, K. Iyoda, H. Ito, Y. Hasegawa, H. Iwata, Examination of synovial fluid and serum hyaluronidase activity as a joint marker in rheumatoid arthritis and osteoarthritis patients (by zymography), *Ann. Rheum. Dis.* 58 (1999) 186–188.
- [47] A. Minassian, D. O'Hare, K.H. Parker, J.P. Urban, K. Warensjo, C.P. Winlove, Measurement of the charge properties of articular cartilage by an electrokinetic method, *J. Orthop. Res.* 16 (1998) 720–725.
- [48] J.N. Israelachvili, G.E. Adams, Measurement of forces between two mica surfaces in aqueous electrolyte solutions in the range 0–100 nm, *Journal of the Chemical Society, Faraday Transactions 1: Physical Chemistry in Condensed Phases*. 74 (1978) 975–1001.
- [49] W.F. Heinz, J.H. Hoh, Relative Surface Charge Density Mapping with the Atomic Force Microscope, *Biophys. J.* 76 (1999) 528–538.
- [50] G.D. Degen, P.R. Stow, R.B. Lewis, R.C. Andresen Eguiluz, E. Valois, K. Kristiansen, A. Butler, J.N. Israelachvili, Impact of Molecular Architecture and Adsorption Density on Adhesion of Mussel-Inspired Surface Primers with Catechol-Cation Synergy, *J. Am. Chem. Soc.* 141 (2019). <https://doi.org/10.1021/jacs.9b04337>.
- [51] G.P. Maier, M.V. Rapp, J.H. Waite, J.N. Israelachvili, A. Butler, Adaptive synergy between catechol and lysine promotes wet adhesion by surface salt displacement, *Science*. 349 (2015) 628.
- [52] J. Fan, C. Myant, R. Underwood, P. Cann, Synovial fluid lubrication of artificial joints: protein film formation and composition, *Faraday Discuss.* 156 (2012) 69.
- [53] K.M.N. Oates, W.E. Krause, R.L. Jones, R.H. Colby, Rheopexy of synovial fluid and protein aggregation, *J. R. Soc. Interface*. 3 (2005) 167–174.
- [54] P. Richetti, P. Kékicheff, Direct measurement of depletion and structural forces in a micellar system, *Phys. Rev. Lett.* 68 (1992) 1951–1954.
- [55] M.A. MacConail, The movements of Bones and Joints, *J. Bone Joint Surg.* 33B (1951) 251–257.
- [56] R. Crockett, A. Grubelnik, S. Roos, C. Dora, W. Born, H. Troxler, Biochemical composition of the superficial layer of articular cartilage, *J. Biomed. Mater. Res. A*. 82 (2007) 958–964.

- [57] C.R. Orford, D.L. Gardner, Ultrastructural histochemistry of the surface lamina of normal articular cartilage, *Histochem. J.* 17 (1985) 223–233.
- [58] G.D. Degen, Y.-T. Chen, A.L. Chau, L.K. Månsson, A.A. Pitenis, Poroelasticity of highly confined hydrogel films measured with a surface forces apparatus, *Soft Matter*. 16 (2020) 8096–8100.
- [59] K. Wang, R.C. Andresen Eguiluz, F. Wu, B.R. Seo, C. Fischbach, D. Gourdon, Stiffening and unfolding of early deposited-fibronectin increase proangiogenic factor secretion by breast cancer-associated stromal cells, *Biomaterials*. 54 (2015). <https://doi.org/10.1016/j.biomaterials.2015.03.019>.
- [60] S.G. Cook, L.J. Bonassar, Interaction with Cartilage Increases the Viscosity of Hyaluronic Acid Solutions, *ACS Biomater Sci Eng.* 6 (2020) 2787–2795.
- [61] V.C. Mow, S.C. Kuei, W.M. Lai, C.G. Armstrong, Biphasic Creep and Stress Relaxation of Articular Cartilage in Compression: Theory and Experiments, *J. Biomech. Eng.* 102 (1980) 73–84.
- [62] A.F. Mak, W.M. Lai, V.C. Mow, Biphasic indentation of articular cartilage—I. Theoretical analysis, *J. Biomech.* 20 (1987) 703–714.
- [63] I. Catelas, M.A. Wimmer, New insights into wear and biological effects of metal-on-metal bearings, *J. Bone Joint Surg. Am.* 93 Suppl 2 (2011) 76–83.
- [64] I. Catelas, M.A. Wimmer, S. Utzschneider, Polyethylene and metal wear particles: characteristics and biological effects, *Semin. Immunopathol.* 33 (2011) 257–271.
- [65] A. Igual Munoz, J. Schwiesau, B.M. Jolles, S. Mischler, In vivo electrochemical corrosion study of a CoCrMo biomedical alloy in human synovial fluids, *Acta Biomater.* 21 (2015) 228–236.
- [66] M.R. Widmer, M. Heuberger, J. Vörös, N.D. Spencer, Influence of polymer surface chemistry on frictional properties under protein-lubrication conditions: implications for hip-implant design, *Tribology Letters; Dordrecht*. 10 (2001) 111–116.
- [67] K. Wang, C. Zhou, Y. Hong, X. Zhang, A review of protein adsorption on bioceramics, *Interface Focus*. 2 (2012) 259–277.
- [68] M. Parkes, C. Myant, P.M. Cann, J.S.S. Wong, Synovial Fluid Lubrication: The Effect of Protein Interactions on Adsorbed and Lubricating Films, *Biotribology*. 1–2 (2015) 51–60.

## GRAPHICAL ABSTRACT

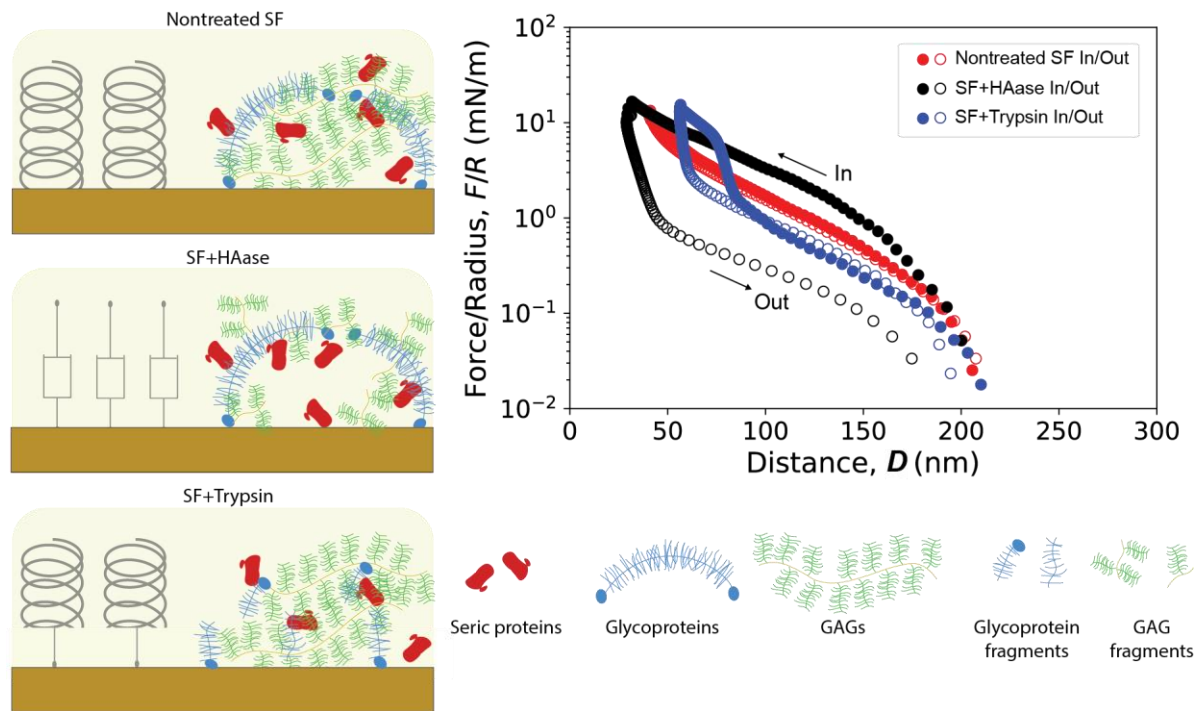

## **Supporting Information**

# **Glycosaminoglycans and glycoproteins influence the elastic response of synovial fluid nanofilms on model oxide surfaces**

Amar S. Mann,<sup>1</sup> Ariell M. Smith,<sup>1</sup> Joyce O. Saltzherr,<sup>1</sup> Arvind Gopinath,<sup>2,3</sup> Roberto C. Andresen Eguiluz<sup>1,3\*</sup>

<sup>1</sup>Department of Materials Science and Engineering, <sup>2</sup>Department of Bioengineering, Health

<sup>3</sup>Sciences Research Institute, University of California, Merced, California 95344, United States

## **EXPERIMENTAL SECTION**

### **Quartz Crystal Microbalance with Dissipation (QCM-D)**

QCM-D measurements were performed using an openQCM-Q1 microbalance (Novaetech SRL, Pompey, Italy), AT-cut crystals coated with 50 nm silica, 5 MHz fundamental frequency (NanoScience Instruments, QSX 303), and the 3<sup>rd</sup> overtone ( $f_3$ ). First, silica crystals were cleaned with 2% w/v sodium dodecyl sulfate (SDS) solutions (MP Biomedicals LLC, 811032), followed by 2% w/v digestive enzyme solution (Contrex EZ, 5405), copious amounts of ultrapure water, 70% ethanol, then dried under a stream of compressed nitrogen, and ending with a plasma cleaning step for 2 minutes (PDC32-G, Harrick, USA) before use. The baseline for the measurements were obtained by flowing PBS through the system and allowing for equilibration, using a peristaltic pump set at ~75  $\mu$ L/min (Golander LLC, BQ80S Microflow Variable-Speed). SF solutions (nontreated SF, SF+HAase, or SF+Trypsin) were then pumped through the system, filling the fluid cell and stopping the flow. After surfaces reached saturation, approximately after 30 minutes, PBS was pumped to remove loosely bound molecules, referred to as rinsing step. After each experiment, the tubing and system were cleaned with 2% w/v digestive enzyme solution, 2% w/v SDS, and ultrapure water. All measurements were conducted at 25 °C.

The resonance frequency ( $f$ ) of a quartz crystal microbalance in contact with liquid is determined as described by Kanazawa and Gordon.[1,2] The dissipation ( $d$ ) of the crystal for our system is determined by measuring the full width half max (FWHM) of the resonant conductance curve.[3,4]

**Theoretical modeling of the QCM-D data.** In QCM-D measurements, a quartz crystal oscillator is set to oscillate at its resonance frequency. The shift in frequency due to the formation of an SF adsorption layer is typically 10-200 Hz. The frequency and dissipation changes can be related to the mass oscillating with the crystal and the viscoelastic properties of the layer through various models.[5]

**The Sauerbrey model.** The Sauerbrey model, equation 1, relates the frequency change ( $\Delta f_n$ ) of the oscillating quartz crystal, due to the presence of a thin film, to the change in surface mass density of the film ( $\Delta \Gamma$ ):[6]

$$\frac{\Delta f_n}{n} = -\frac{f_0}{t_q \rho_q} \Delta \Gamma = -c \Delta \Gamma \quad (1)$$

where  $n$ ,  $f_0$ ,  $t_q$ ,  $\rho_q$  are the overtone number, the fundamental frequency of the quartz oscillator, the thickness, and the density of quartz, respectively. The value for  $c$  of the crystals used is  $17.7 \text{ ng Hz}^{-1} \text{ cm}^{-2}$ . [Citation error] The Sauerbrey equation gives the surface mass density, including liquid inside the film. Eq. 1 is valid only for thin films in air. However, for lateral homogeneous films with a change in dissipation value larger than zero ( $\Delta d > 0$ ), the elastic component of the shear dependent compliance ( $\nu$ ) can be approximated from the ratio between the change in dissipation ( $\Delta d$ ) and the change in surface mass density ( $\Delta \Gamma$ ):[5,7,8]

$$\nu = -\frac{\Delta d}{\Delta \Gamma} \quad (2)$$

In QCM-D, the dissipation is defined as the sum of all energy losses in the system per oscillation cycle, and it is a dimensionless number, as it relates the energy lost per cycle over the energy stored. An ideally rigid film will have zero dissipation for any change in surface mass density. For a purely viscous film, the maximum possible change in dissipation is -2 for every Hz, which adjusted to surface mass density is  $644 \Delta d \text{ ng}^{-1} \text{ cm}^2$ . A kinetic model was used to determine the time it took each SF treatment and dilution to saturate the silica surfaces, the saturation time  $\tau$ , obtained by:[9]

$$\Gamma = \Delta \Gamma_{max} \left(1 - e^{-\frac{t}{\tau}}\right) \quad (3)$$

where  $\Gamma$  is the instantaneous surface mass density,  $\Delta \Gamma_{max}$  is the maximum measured change in surface mass density, and  $t$  the experimental time. The saturation time,  $\tau$  was used as free fitting parameter. Time  $t = 0$  corresponds to the injection of either nontreated SF, SF+HAase, or SF+Trypsin.

**The Langmuir isotherm model.** The Langmuir model, equation 4, describes the coverage of molecules adsorbed on a solid surface:[9]

$$\Gamma = \frac{\Gamma_{max} K_a [SF]}{1 + K_a [SF]} \quad (4)$$

where  $\Delta \Gamma$  is the change in surface mass density,  $\Delta \Gamma_{max}$  is the change in surface mass upon saturation, and  $K_a$  is the equilibrium constant. While this model is valid for single components, it will be used to describe the coverage of SF molecules adsorbed on the silica surface at different dilutions, with the understanding that SF is a multicomponent and complex fluid.

## Surface Forces Apparatus (SFA)

**SFA surface preparation.** SFA experiments were performed using an SFA 2000 (SurForce LLC, CA, USA). Surfaces were prepared using established procedures.[10,11] Two back silvered mica surfaces, 2–3  $\mu\text{m}$  thick (S&J Trading INC, ruby mica grade #1 V-1/V-2), were glued on cylindrical glass discs with a radius of curvature of  $R = 2 \text{ cm}$  using thermosetting glue (EPON, 1004F). After gluing the mica surfaces, one surface was mounted on a double cantilever spring, with an optically calibrated spring constant of  $k_N = 471 \text{ N/m}$ , resulting in a force (normalized by the radius of curvature,  $F/R$ ) resolution of  $\sim 0.001 \text{ mN/m}$ . The other mica surface was installed on a top holder,

facing the lower surface in a crossed-cylinder configuration, building an optical cavity. Using Multiple Beam Interferometry, the thickness of the mica surfaces was measured at contact in air.[12] The wavelength of the fringes of equal chromatic order (FECO) were recorded using a scientific digital camera (Hamamatsu Orca R<sup>2</sup>, Japan) and post analyzed using an in-house MATLAB (MathWorks, R2020b) script. After the calibration step, surfaces were adjusted to a separation distance ( $D$ ) of ~1 mm and 30  $\mu$ L of nontreated SF, SF+HAase, or SF+Trypsin injected between the surfaces. The bottom of the SFA chamber was filled with water to saturate the atmosphere with water vapor and minimize the evaporation of SF during the experiment.

**SFA measurements.** SFA measurements of the normal interaction forces ( $F$ ) were performed using well-established procedures.[10] After letting the SF solutions saturate the surfaces for 1 hr., surfaces were brought together manually to a separation distance of ~1  $\mu$ m. Then, surfaces were approached (in) or separated (out) at a constant velocity of ~15 nm/s using a DC motor with a 1670:1 gear ratio (Faulhaber Micromo). The separation distance ( $D$ ) between the surfaces and the normal interaction force were measured using FECO analysis.[12] All experiments were performed at 25 °C. Three consecutive measurements were performed in each new position (FR1-3), with 10 min intervals between compression (in/out) cycles. This was followed by a manual-driven compression resulting in surface flattening, finishing with a last motor-controlled  $F$ - $D$  measurement (FR4). Two positions per sample were tested.

**The Alexander-de Gennes model (AdG).** The AdG model, equation 5, relates the force normalized by the radius of curvature ( $F/R$ ) of the interacting films to the equilibrium film thickness ( $L$ ) and the average spacing between close neighboring chains ( $s$ ) of a polymer brush:[13]

$$\frac{F}{R} = \frac{16\pi kTL}{35s^3} \left[ 7 \left( \frac{2L}{D} \right)^{5/4} + 5 \left( \frac{D}{2L} \right)^{7/4} - 12 \right] \quad \text{for } D < 2L \quad (5)$$

where  $k$  is the Boltzmann constant, and  $T$  is the experimental temperature. The first term comes from the osmotic pressure, which increases as the two surfaces approach each other. The second term accounts for the decrease in elastic energy as the films are compressed. This model was originally developed to describe the interaction forces of neutral, grafted polymer brushes. This work does not necessarily imply that the SF films would adopt a well-defined dense brush conformation on the mica substrate. It instead suggests that the film can be described as a purely repulsive effective brush layer. The use of this model is justified by the high salinity of the medium (PBS ~150 mM, with Deby length,  $\kappa < 1$  nm), which is expected to screen most of the electrostatic interactions and can therefore be considered neutral.

**The Dolan and Edwards model (DnE).** The DnE model, equation 6, relates the force normalized by the radius of curvature ( $F/R$ ) of the interacting films to the effective coil size ( $R_{eff}$ ) and the area per chain ( $a$ ):[14]

$$\frac{F}{R} = \frac{72\pi kT}{a} e^{-\frac{D}{R_{eff}}} \quad \text{for } D < R_{eff} \quad (6)$$

where  $k$  is the Boltzmann constant, and  $T$  is the experimental temperature. This model was developed to describe the interaction forces between two surfaces with sparse, end-grafted chains in a theta solvent, that is, engrafted polymers adopting a mushroom configuration, instead of a well swollen polymer brush (AdG). This work does not necessarily imply that the SF films would adopt a mushroom conformation on the mica substrate, instead, it suggests that the film

can be described as a purely repulsive mushroom layer. In this manuscript we report the pre-factor  $A = \frac{72\pi kT}{a}$ , which provides a scaling for the amplitude of the repulsion.

**Bulk rheometry.** To test the effects of enzymatic treatment on SF, we performed bulk rheology measurements. An Anton-Parr rheometer (model MCR-102) with parallel stainless-steel plate attachments (Anton-Parr, PP25, diameter 25 mm) was used to probe the SF sample. Data was collected using Rheocompass. A working gap of 500  $\mu\text{m}$  was used in all experiments. Tests were performed at room temperature (25  $^{\circ}\text{C}$ ) to confirm that enzymatic treatments, SF+HAase and SF+Trypsin, altered the bulk viscoelastic properties of SF. Nontreated SF was used as a control. Viscosity as a function of shear rate is shown in SI Figure 8, for nontreated SF, SF+HAase, and SF+Trypsin. 300 $\mu\text{L}$  total volume of each SF treatment were loaded to the bottom parallel plate of the rheometer. The top plate was lowered until the final gap reached 500 $\mu\text{m}$ ; the assembly was then left for 5 minutes to equilibrate. Viscosity measurements were taken at constant flow for 5 minutes at a specific shear rate. Shear rate was varied from 0.01 to 1000 1/s.

**Refractive index measurements.** A benchtop Abbe refractometer (Atago Co.) was used to determine the refractive index ( $\eta$ ) of nontreated SF, SF+HAase, and SF+Trypsin with  $\pm 0.0005$  resolution.

## RESULTS

### Film formation kinetics

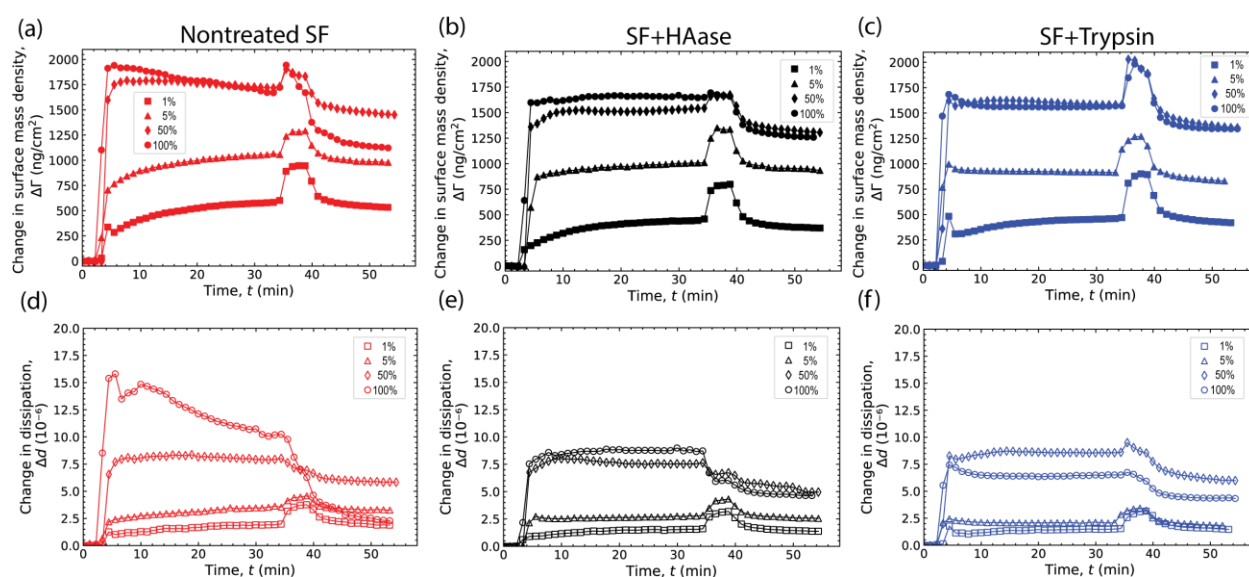

**SI Figure 1. Change in surface mass density and change in dissipation during the adsorption of SFs to silica.** (a) Nontreated SF, (b) SF+HAase, and (c) SF+Trypsin at the four tested concentrations, 1%, 5%, 50%, and 100%. For clarity, only every 100<sup>th</sup> data point is shown.

**SI Table 1. Film formation kinetics parameters.** Saturation time,  $\tau$ , from eq. 3, and surface mass density lost during the PBS rinse,  $\Delta\Delta\Gamma$ .

| Condition | $\tau_{1\%}$ (min) | $\Delta\Delta\Gamma_{1\%}$ (ng/cm <sup>2</sup> ) | $\tau_{5\%}$ (min) | $\Delta\Delta\Gamma_{5\%}$ (ng/cm <sup>2</sup> ) | $\tau_{50\%}$ (min) | $\Delta\Delta\Gamma_{50\%}$ (ng/cm <sup>2</sup> ) | $\tau_{100\%}$ (min) | $\Delta\Delta\Gamma_{100\%}$ (ng/cm <sup>2</sup> ) |
|-----------|--------------------|--------------------------------------------------|--------------------|--------------------------------------------------|---------------------|---------------------------------------------------|----------------------|----------------------------------------------------|
|-----------|--------------------|--------------------------------------------------|--------------------|--------------------------------------------------|---------------------|---------------------------------------------------|----------------------|----------------------------------------------------|

|                      |           |           |           |           |           |            |           |            |
|----------------------|-----------|-----------|-----------|-----------|-----------|------------|-----------|------------|
| <b>Nontreated SF</b> | 3.4 ± 1.9 | -44 ± 6   | 2.0 ± 1.1 | -76 ± 11  | 0.9 ± 0.3 | -230 ± 47  | 0.7 ± 0.3 | -520 ± 142 |
| <b>SF + HAase</b>    | 4.0 ± 1.9 | -67 ± 32  | 2.1 ± 0.9 | -105 ± 23 | 0.9 ± 0.2 | -218 ± 35  | 0.9 ± 0.3 | -532 ± 128 |
| <b>SF + Trypsin</b>  | 1.6 ± 0.9 | -42 ± 9.5 | 0.7 ± 0.1 | -95 ± 13  | 0.9 ± 0.5 | -331 ± 207 | 1.0 ± 0.2 | -320 ± 151 |

## Langmuir adsorption isotherms

**SI Table 2. Langmuir model fitting results.** Maximum surface mass density ( $\Gamma$ ), maximum dissipation ( $d$ ), and equilibrium constant ( $K_a$ ) values obtained by using the Langmuir model, eq. 4.

| Condition     | Maximum surface mass density, $\Gamma_{max}$ (ng/cm <sup>2</sup> ) |            | Maximum dissipation, $d_{max}$ (x10 <sup>-6</sup> ) |            | $K_a$ (min) |            |
|---------------|--------------------------------------------------------------------|------------|-----------------------------------------------------|------------|-------------|------------|
|               | Pre-rinse                                                          | Post-rinse | Pre-rinse                                           | Post-rinse | Pre-rinse   | Post-rinse |
| Nontreated SF | 1638.8                                                             | 1245.5     | 13.0                                                | 3.8        | 0.47        | 0.82       |
| SF+HAase      | 1678.8                                                             | 1317.0     | 10.0                                                | 5.3        | 0.36        | 0.49       |
| SF+Trypsin    | 1707                                                               | 1402.5     | 9.3                                                 | 5.4        | 0.39        | 0.50       |

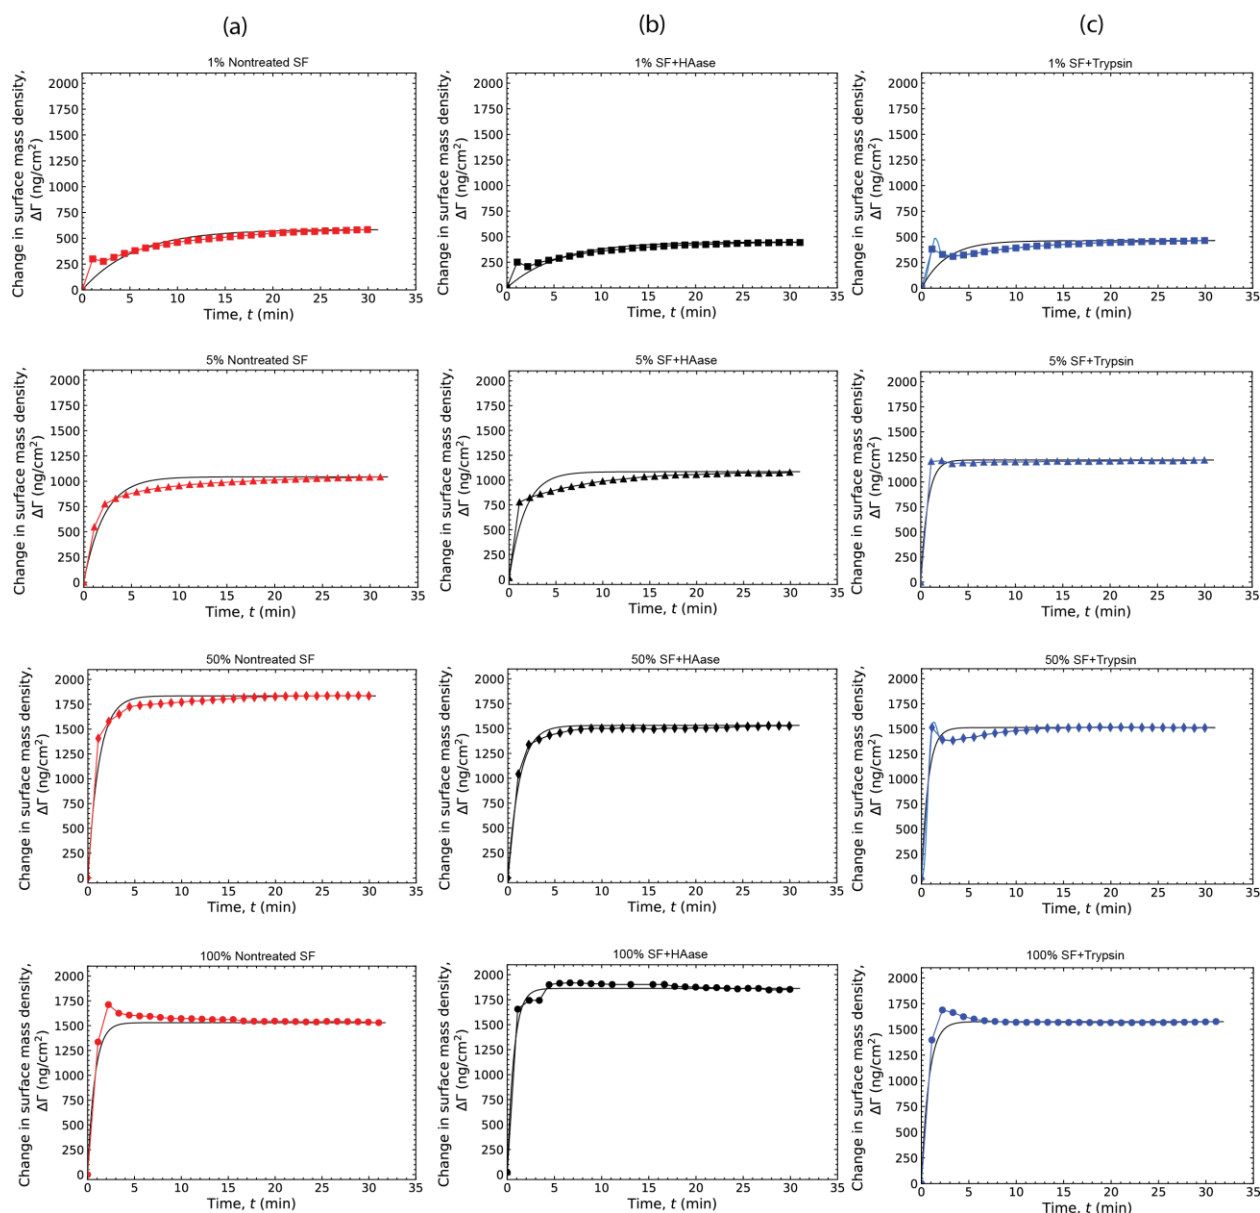

**SI Figure 2. Change in surface mass density during the adsorption of SF to silica.** (a) Nontreated SF, (b) SF+HAase, and (c) SF+Trypsin. For clarity, only every 100<sup>th</sup> data point is shown.

**SI Table 3. Langmuir model fitting results.** Maximum surface mass density ( $\Gamma$ ), maximum dissipation ( $d$ ), and equilibrium constant ( $K_a$ ) values obtained by using the Langmuir model, eq. 4.

| Condition     | Maximum surface mass density, $\Gamma_{max}$ (ng/cm <sup>2</sup> ) |            | Maximum dissipation, $d_{max}$ (x10 <sup>-6</sup> ) |            | $K_a$ (min) |            |
|---------------|--------------------------------------------------------------------|------------|-----------------------------------------------------|------------|-------------|------------|
|               | Pre-rinse                                                          | Post-rinse | Pre-rinse                                           | Post-rinse | Pre-rinse   | Post-rinse |
| Nontreated SF | 1638.8                                                             | 1245.5     | 13.0                                                | 3.8        | 0.47        | 0.82       |
| SF+HAase      | 1678.8                                                             | 1317.0     | 10.0                                                | 5.3        | 0.36        | 0.49       |
| SF+Trypsin    | 1707                                                               | 1402.5     | 9.3                                                 | 5.4        | 0.39        | 0.50       |

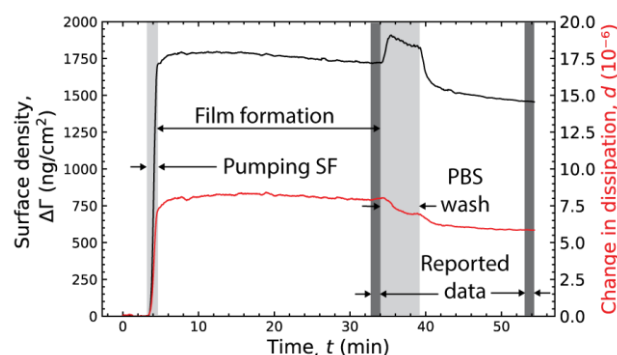

**SI Figure 3. QCM-D experimental timeline.** Surface density as a function of time indicating the pumping of 50% nontreated SF, the film formation, PBS wash, and the regions used to collect reported data for intrinsic viscosity.

### Normal interaction forces between mica surfaces across undiluted SF

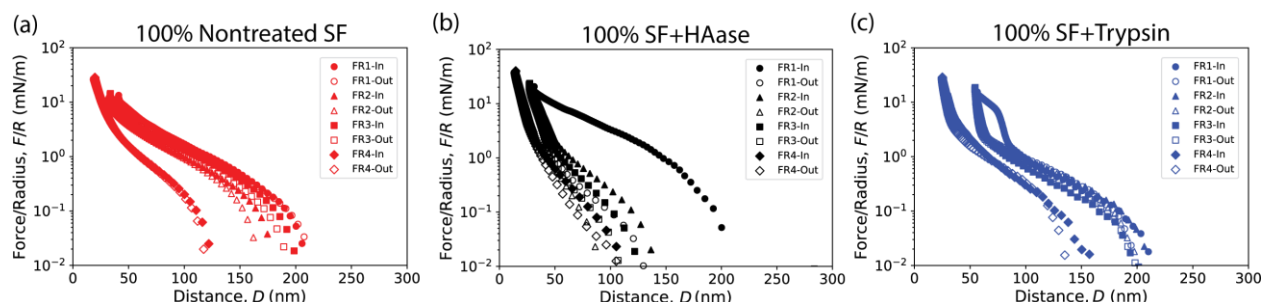

**SI Figure 4. Normal interaction forces between two mica surfaces across nondiluted SF.** All conditions were purely repulsive, and no adhesion was measured. (a) Nontreated SF showed little hysteresis between loading (in) and unloading (out), as well as between compression cycles (FR1-3). (b) SF+HAase showed significant hysteresis between, and (c) SF+Trypsin.

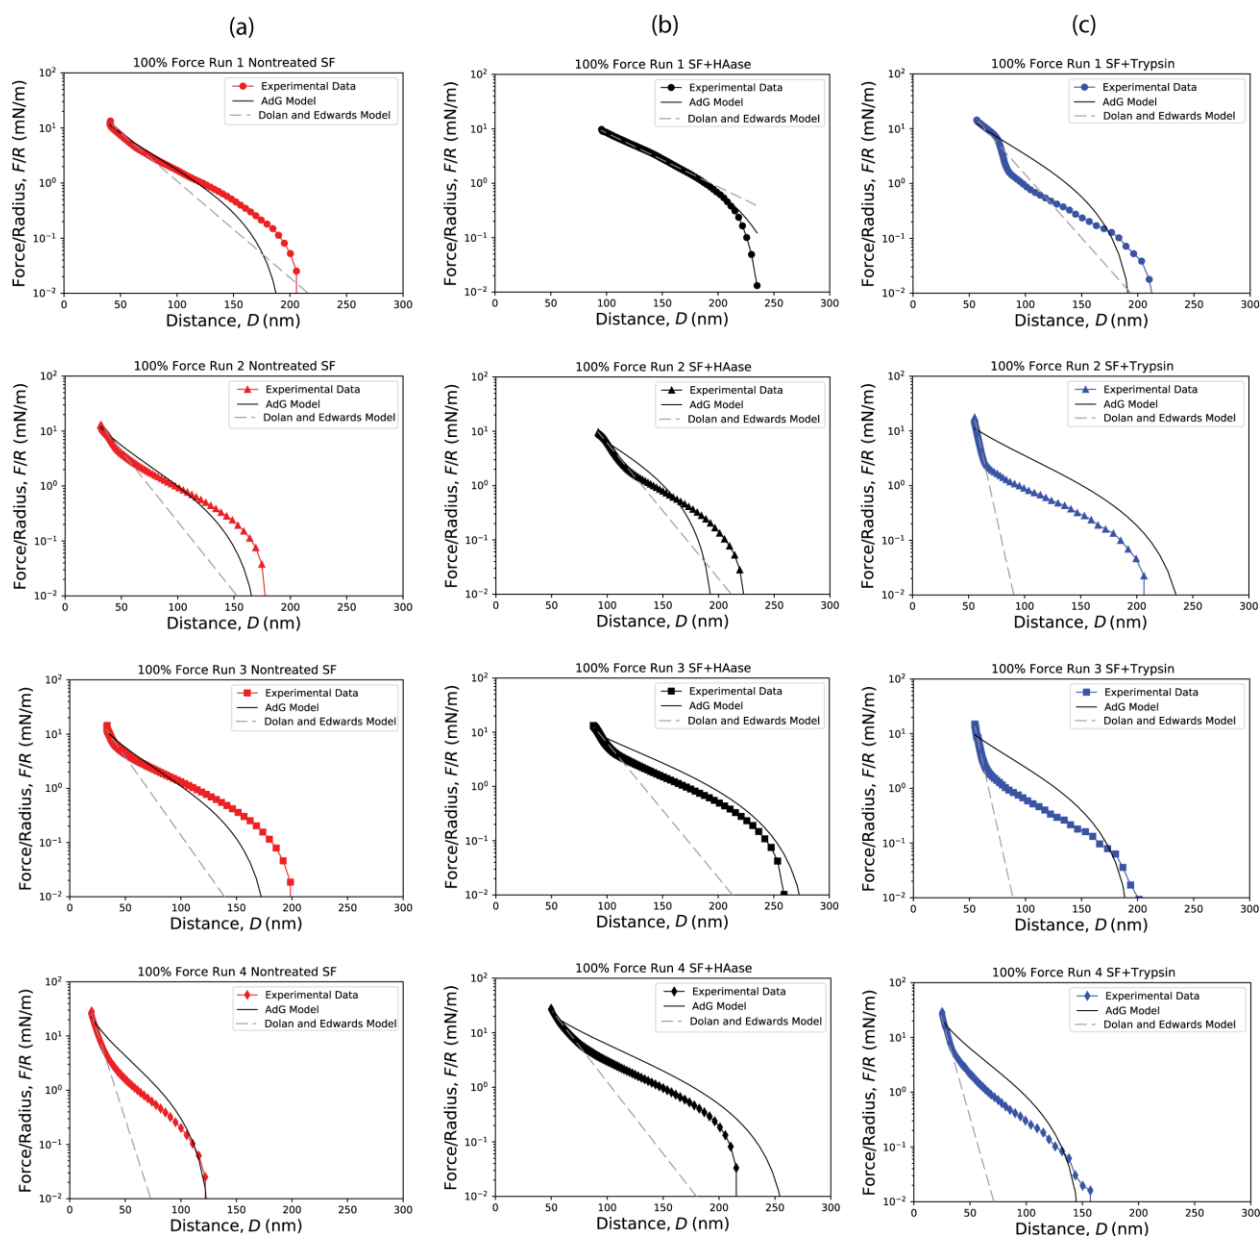

**SI Figure 5. Experiment, Alexander-de Gennes (AdG), and Dolan and Edwards (DnE) model comparison for 100% nontreated SF, FS+HAase, and SF+Trypsin.** Comparison between experimental normal interaction forces and best fit values for the AdG theory of end-grafted polymer brushes (eq. 5) and DnE model for two mica surfaces across SF. Note that the experimental data, AdG, and DnE models are shown in semilogarithmic plots.

**SI Table 4. Parameters obtained from non-linear least-square fits for AdG and DnE models for 100% SF films.** Effective brush thickness ( $L$ ) and grafting distance ( $s$ ) from the AdG brush model (eq. 5), and radius of gyration ( $R_g$ ) and pre-factor ( $A$ ) from the DnE model (eq. 6) used to fit the interaction forces between two mica surfaces across SFs for Force Runs 1-3 in.

| Condition     | Alexander-de Gennes model, eq. 5    |                                       |                 | Dolan and Edwards model, eq. 6  |                           |                 |
|---------------|-------------------------------------|---------------------------------------|-----------------|---------------------------------|---------------------------|-----------------|
|               | Effective brush thickness, $L$ (nm) | Effective grafting distance, $s$ (nm) | Fit $r^2$ value | Effective coil size, $R_g$ (nm) | Prefactor, $A$ (mN/m)     | Fit $r^2$ value |
| Nontreated SF | $93 \pm 6$                          | $0.59 \pm 0.01$                       | $0.98 \pm 0.01$ | $19 \pm 5.0$                    | $84 \pm 26$               | $0.98 \pm 0.01$ |
| SF + HAase    | $125 \pm 23$                        | $0.47 \pm 0.08$                       | $0.95 \pm 0.02$ | $663 \pm 1100$                  | $1320 \pm 1070$           | $0.99 \pm 0.01$ |
| SF + Trypsin  | $107 \pm 14$                        | $0.54 \pm 0.07$                       | $0.88 \pm 0.07$ | $9.5 \pm 8.0$                   | $1,228,045 \pm 1,087,503$ | $0.99 \pm 0.01$ |
| Bovine SF*    | $60 \pm 13$                         | $1.15 \pm 0.23$                       | NA              | NA                              | NA                        | NA              |

\*From reference [15]

### Normal interaction forces between mica surfaces across diluted (5%) SF

Next, based on the Langmuir adsorption isotherm results, we asked how partially formed films would respond to confinement. We investigated the interaction forces of mica across 5% nontreated SF, SF+HAase, and SF+Trypsin using the SFA. Figure 5 and SI Figure 6 show representative force-distance profiles. Like what observed for nondiluted (100%) films, the force-distance profiles were purely repulsive, and the range and the magnitude of the repulsion varied with treatment and compression cycle. Nontreated SF and SF+HAase force-distance profiles were alike qualitatively and quantitatively. The onset of repulsion,  $D_0$ , for both treatments was measured to be  $\sim 95$  nm, reaching a HW at  $\sim 10$  nm.  $D_0$  shifted to lower values with each subsequent compression cycle, to  $\sim 75$  nm, and  $\sim 50$  nm. The HW value remained constant for both treatments after a second and third compression at  $\sim 10$  nm. This was not the behavior shown by SF+Trypsin, where  $D_0$  for the first compression cycle (Force Run 1, Figure 5(a)) was  $\sim 200$  nm, reaching a HW at  $\sim 50$  nm.  $D_0$ , and HW values decreased with each subsequent compression cycle. For  $D_0$ , values decreased to  $\sim 90$  nm and  $\sim 60$  nm, and for HW to  $\sim 25$  nm and  $\sim 10$  nm, for Force Run 2 and 3, respectively. While little to no hysteresis was observed for 5% nontreated SF and for 5% SF+HAase either between in (loading) and out (unloading) or between cycles (Force Run 1-3), 5% SF+Trypsin showed considerable hysteresis, between in/out (loading/unloading) and between cycles (Force Runs). Interestingly,  $D_0$  for Force Run 2 and 3 were very close to the termination of interaction of Force Run 1 and 2, respectively. This observation suggests that the film has been plastically deformed.

Repeating the experimental procedures introduced for nondiluted SF (100%) and to test if molecular film re-arrangement continued with higher applied normal forces ( $F/R > 200$  mN/m), we manually compressed nontreated SF, SF+HAase, and SF+Trypsin films until visible surface deformation/flattening occurred, followed by a final motor-controlled loading-unloading cycle, 10 minutes after the manual compression. All conditions experienced plastic/viscoelastic

deformation, observed by a shift in  $D_0$  to smaller distances. In this configuration, interestingly, all three conditions responded similarly to the dynamic force-distance measurement after the manual compression. Nontreated SF, SF+HAase, and SF+Trypsin  $D_0$  decreased to ~50-70 nm, while the HW remained at ~10 nm, Figure 5(d), with minimal hysteresis between in/out (loading/unloading) profiles.

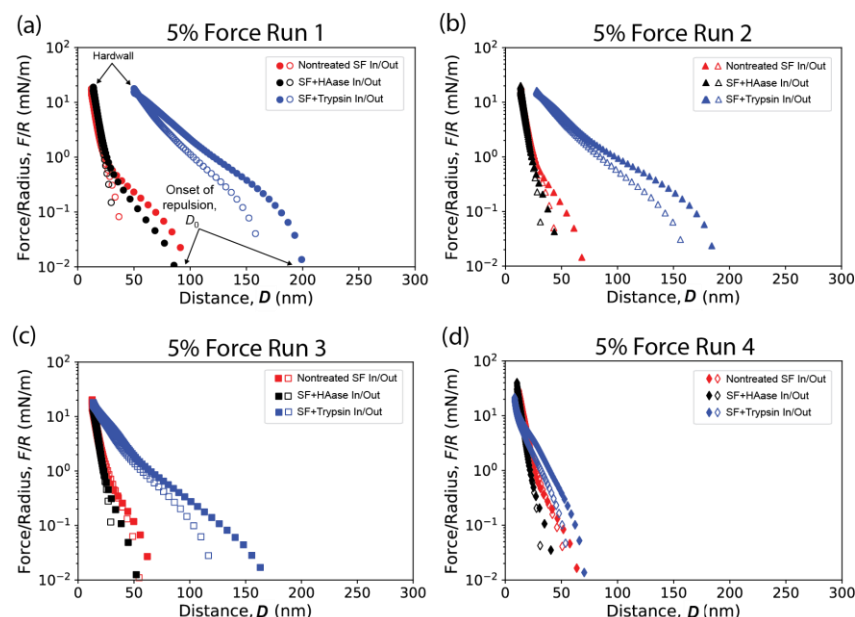

**Figure 5. Comparison of normal interaction forces between two mica surfaces across 5% diluted synovial fluid.** All conditions were purely repulsive, and no adhesion was measured. Profiles of the loading (in, filled symbols) and unloading (out, open symbols) for (a) first cycle, (b) second cycle, (c) third cycle, and (d) fourth cycle of nontreated SF, SF+HAase, and SF+Trypsin.

We used the same two models, the AdG (eq. 5) and the DnE (eq.6) employed in the previous section to understand the repulsive behavior of the diluted films. Experimental data and fitted parameters obtained from non-linear least-squares are shown in SI Figure 7 and summarized in SI Table 4. First, we used the AdG model (eq.5) to obtain the average effective brush thickness ( $L$ ) and average effective grafting distance ( $s$ ) values. For nontreated SF,  $L$  and  $s$  were  $49 \pm 8$  nm and  $0.6 \pm 0.1$  nm, values that were similar in order of magnitude to SF+HAase,  $33 \pm 18$  nm and  $0.4 \pm 0.2$  nm for  $L$  and  $s$ , respectively. Interestingly, for SF+Trypsin, larger  $L$  and  $s$  values were observed,  $107 \pm 9$  nm and  $0.7 \pm 0.3$  nm, respectively. These values are very close to what measured for nondiluted SF+Trypsin ( $L = 107 \pm 14$  nm;  $s = 0.54 \pm 0.07$  nm).

Second, we used the Dolan and Edwards model (eq.6) to acquire the effective coil size,  $R_{eff}$ , and pre-factor  $A$  to model the SF films as end-grafted polymers in a mushroom configuration. For nontreated SF,  $R_{eff}$  and  $A$  were  $3.8 \pm 0.2$  nm and  $462 \pm 78$  mN/m and for SF+HAase  $3.6 \pm 0.2$  nm and  $690 \pm 78$  mN/m, respectively. Not surprisingly, based on the previous AdG results, the  $R_{eff}$  and  $A$  values for SF+Trypsin were  $22.5 \pm 4.6$  nm and  $63 \pm 37$  mN/m, an order of magnitude higher for  $R_{eff}$  compared to nontreated SF and SF+HAase, and an order of magnitude lower for the pre-factor  $A$  compared to nontreated SF and SF+HAase. Based on the coefficient of determination ( $r^2$ ) from our least-squares regression of the AdG and DnE models, summarized in SI Table 4, we observe that the prediction of the confinement force normalized by the radius of curvature as a function of the separation distance is more accurately described as an end-grafted polymer in the mushroom regime.

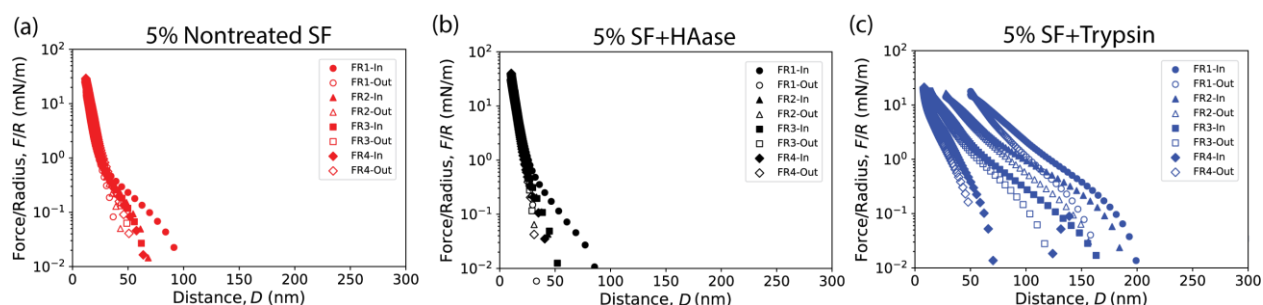

**SI Figure 6. Normal interaction forces between two mica surfaces across bovine synovial fluid.** All conditions were purely repulsive, and no adhesion was measured. (a) Nontreated SF showed little hysteresis between loading (in) and unloading (out), as well as between compression cycles (FR1-3). (b) SF+HAase showed significant hysteresis between, and (c) SF+Trypsin.

**SI Table 5. Parameters obtained from non-linear least-square fits for AdG and DnE models for 5% SF films.** Effective brush thickness ( $L$ ) and grafting distance ( $s$ ) from the AdG brush model (eq. 5), and radius of gyration ( $R_g$ ) and prefactor ( $A$ ) from the DnE model (eq. 6) used to fit the interaction forces between two mica surfaces across SFs for Force Runs 1-3 in.

| Condition     | Alexander-de Gennes model, eq. 5    |                                       |                  | Dolan and Edwards model, eq. 6  |                        |                  |
|---------------|-------------------------------------|---------------------------------------|------------------|---------------------------------|------------------------|------------------|
|               | Effective brush thickness, $L$ (nm) | Effective grafting distance, $s$ (nm) | Fit $r^2$ value  | Effective coil size, $R_g$ (nm) | Pre-factor, $A$ (mN/m) | Fit $r^2$ value  |
| Nontreated SF | $49.0 \pm 8.0$                      | $0.6 \pm 0.1$                         | $0.93 \pm 0.005$ | $3.8 \pm 0.2$                   | $462 \pm 78$           | $0.99 \pm 0.001$ |
| SF + HAase    | $33.0 \pm 18.0$                     | $0.4 \pm 0.2$                         | $0.93 \pm 0.005$ | $3.6 \pm 0.2$                   | $690 \pm 78$           | $0.99 \pm 0.001$ |
| SF + Trypsin  | $107.0 \pm 9.0$                     | $0.7 \pm 0.3$                         | $0.99 \pm 0.001$ | $22.5 \pm 37$                   | $4.6 \pm 37$           | $0.99 \pm 0.001$ |

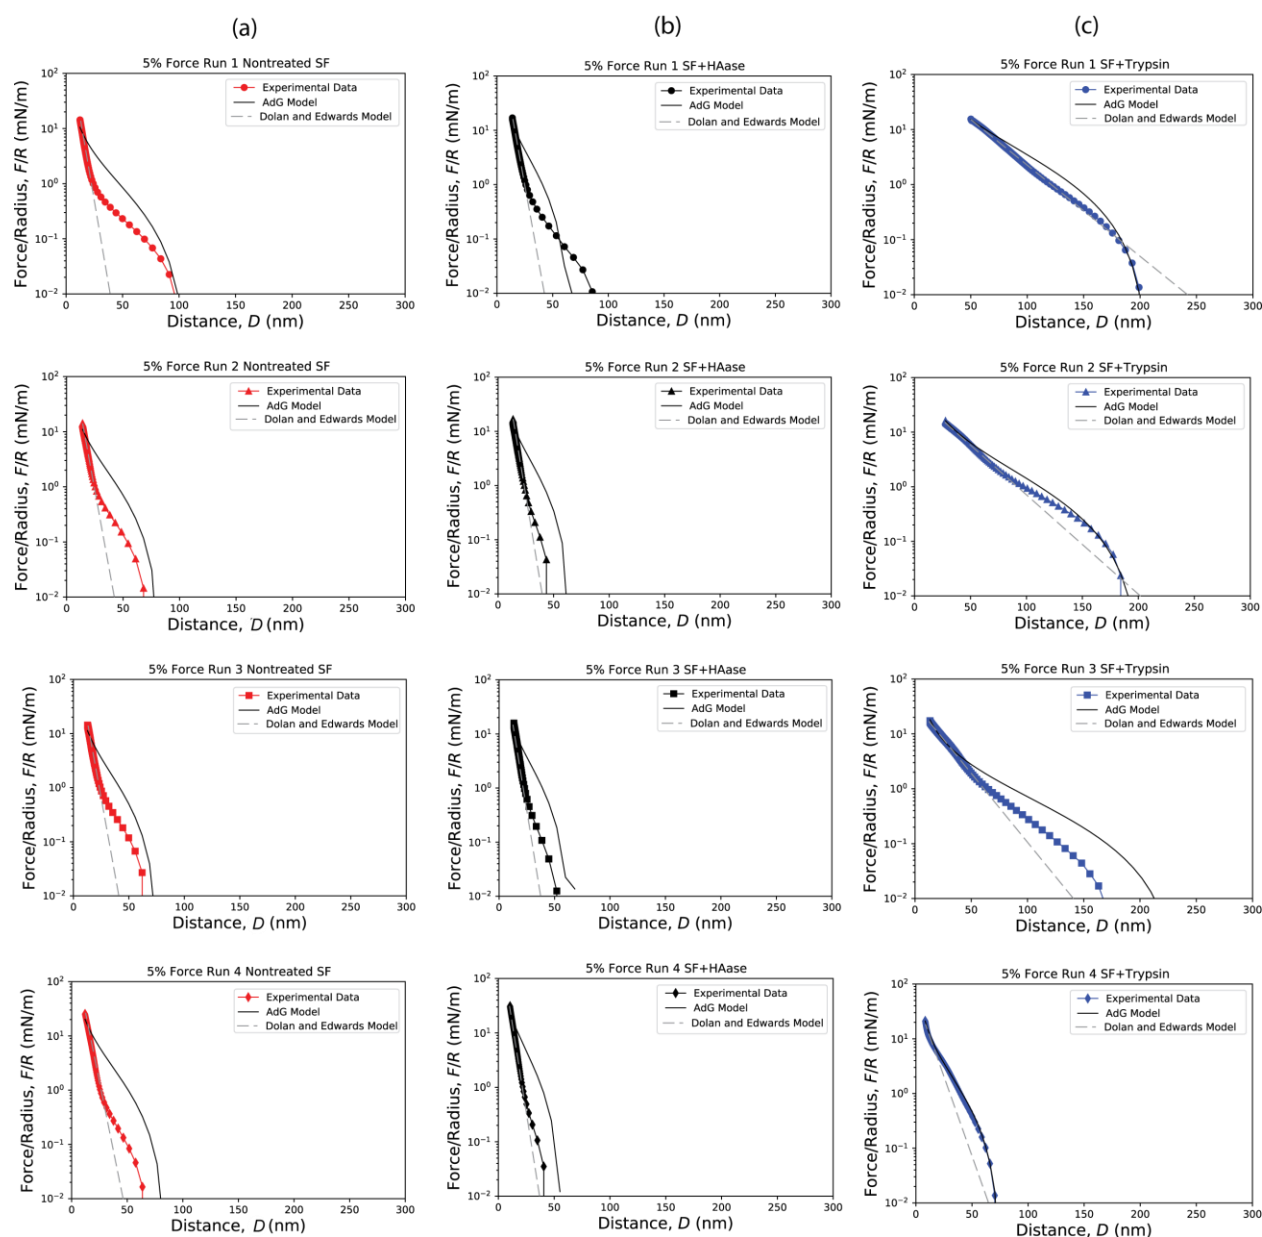

**SI Figure 7. Experiment, Alexander-de Gennes (AdG), and Dolan and Edwards (DnE) model comparison for 5% nontreated SF, FS+HAase, and SF+Trypsin.** Comparison between experimental normal interaction forces and best fit values for the AdG theory of end-grafted polymer brushes (eq. 5) and DnE model for two mica surfaces across SF. Note that the experimental data, AdG, and DnE models are shown in semilogarithmic plots.

**SI Table 6. Parameters obtained from non-linear least-square fits for AdG and DnE models for 5% SF films.** Effective brush thickness ( $L$ ) and grafting distance ( $s$ ) from the AdG brush model (eq. 5), and radius of gyration ( $R_g$ ) and prefactor ( $A$ ) from the DnE model (eq. 6) used to fit the interaction forces between two mica surfaces across SFs for Force Runs 1-3 in.

| Condition     | Alexander-de Gennes model, eq. 5    |                                       |                  | Dolan and Edwards model, eq. 6  |                        |                  |
|---------------|-------------------------------------|---------------------------------------|------------------|---------------------------------|------------------------|------------------|
|               | Effective brush thickness, $L$ (nm) | Effective grafting distance, $s$ (nm) | Fit $r^2$ value  | Effective coil size, $R_g$ (nm) | Pre-factor, $A$ (mN/m) | Fit $r^2$ value  |
| Nontreated SF | $49.0 \pm 8.0$                      | $0.6 \pm 0.1$                         | $0.93 \pm 0.005$ | $3.8 \pm 0.2$                   | $462 \pm 78$           | $0.99 \pm 0.001$ |
| SF + HAase    | $33.0 \pm 18.0$                     | $0.4 \pm 0.2$                         | $0.93 \pm 0.005$ | $3.6 \pm 0.2$                   | $690 \pm 78$           | $0.99 \pm 0.001$ |
| SF + Trypsin  | $107.0 \pm 9.0$                     | $0.7 \pm 0.3$                         | $0.99 \pm 0.001$ | $22.5 \pm 37$                   | $4.6 \pm 37$           | $0.99 \pm 0.001$ |

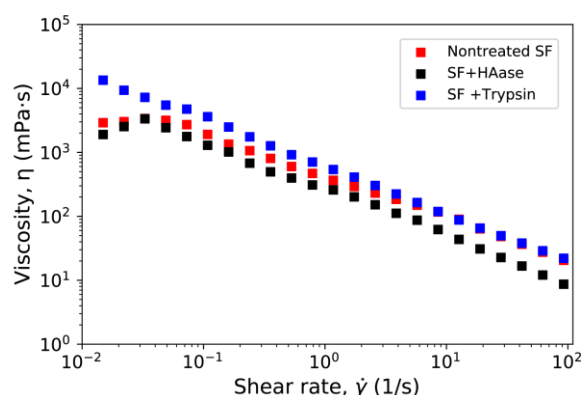

**SI Figure 8. Bulk viscosity of SFs.** Nontreated SF, SF+HAase, and SF+Trypsin as a function of shear rate.

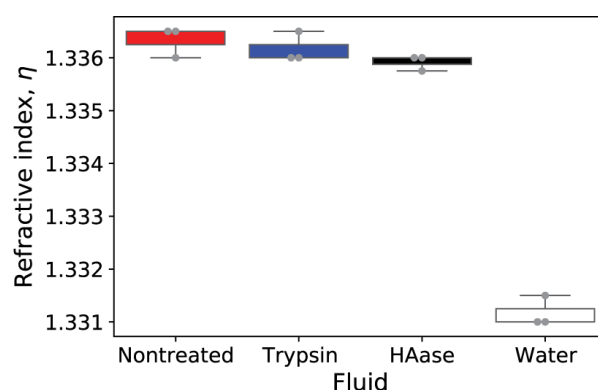

**SI Figure 9. Bulk refractive index of SF.** Digestion of HA and proteins did not change the refractive index of SF. Water refractive index value is shown as a control.

## REFERENCES

- [1] K.K. Kanazawa, J.G. Gordon, Frequency of a Quartz Microbalance in Contact with Liquid, *Anal. Chem.* 57 (1985) 1770–1771.
- [2] K. Keiji Kanazawa, J.G. Gordon, The oscillation frequency of a quartz resonator in contact with liquid, *Anal. Chim. Acta.* 175 (1985) 99–105.
- [3] R. Beck, U. Pittermann, K.G. Weil, Impedance analysis of quartz oscillators, contacted on one side with a liquid, *Ber. Bunsenges. Phys. Chem.* 92 (1988) 1363–1368.
- [4] D. Johannsmann, A. Langhoff, C. Leppin, Studying Soft Interfaces with Shear Waves: Principles and Applications of the Quartz Crystal Microbalance (QCM), *Sensors* . 21 (2021). <https://doi.org/10.3390/s21103490>.
- [5] I. Reviakine, D. Johannsmann, R.P. Richter, Hearing What You Cannot See and Visualizing What You Hear, *Anal. Chem.* 83 (2011) 8838–8848.
- [6] G. Sauerbrey, Verwendung von Schwingquarzen zur Waegung duenner Schichten und zur Mikrowaegung, *Zeitschrift Fuer Physik.* 155 (1959) 206–222.
- [7] A. Tsortos, G. Papadakis, K. Mitsakakis, K.A. Melzak, E. Gizeli, Quantitative determination of size and shape of surface-bound DNA using an acoustic wave sensor, *Biophys. J.* 94 (2008) 2706–2715.
- [8] A.A. Feiler, A. Sahlholm, T. Sandberg, K.D. Caldwell, Adsorption and viscoelastic properties of fractionated mucin (BSM) and bovine serum albumin (BSA) studied with quartz crystal microbalance (QCM-D), *J. Colloid Interface Sci.* 315 (2007) 475–481.
- [9] A. Antosiewicz, E. Senkara, J. Cieřla, Quartz crystal microbalance with dissipation and microscale thermophoresis as tools for investigation of protein complex formation between thymidylate synthesis cycle enzymes, *Biosensors and Bioelectronics.* 64 (2015) 36–42.
- [10] G.D. Degen, T.R. Cristiani, N. Cadirov, R.C. Andresen Eguiluz, K. Kristiansen, A.A. Pitenis, J.N. Israelachvili, Surface Damage Influences the JKR Contact Mechanics of Glassy Low-Molecular-Weight Polystyrene Films, *Langmuir.* 35 (2019). <https://doi.org/10.1021/acs.langmuir.9b02037>.
- [11] B. Zappone, M. Ruths, G.W. Greene, G.D. Jay, J.N. Israelachvili, Adsorption, lubrication, and wear of lubricin on model surfaces: polymer brush-like behavior of a glycoprotein, *Biophys. J.* 92 (2007) 1693–1708.
- [12] J. Israelachvili, Thin film studies using multiple-beam interferometry, *J. Colloid Interface Sci.* 44 (1973) 259–272.
- [13] P.G. de Gennes, Polymers at an interface; a simplified view, *Adv. Colloid Interface Sci.* 27 (1987) 189–209.
- [14] A.K. Dolan, S.F. Edwards, Theory of the stabilization of colloids by adsorbed polymer, *Proc. R. Soc. Lond. A Math. Phys. Sci.* 337 (1974) 509–516.
- [15] X. Banquy, D.W. Lee, S. Das, J. Hogan, J.N. Israelachvili, Shear-Induced Aggregation of Mammalian Synovial Fluid Components under Boundary Lubrication Conditions, *Adv. Funct. Mater.* 24 (2014) 3152–3161.
